# Supplementary material
Source: PubMed Central journal article supplement (PMC4815099)
Supplement: supp_tpc.15.00203_TPC2015-00203-LSBR2_Supplemental_Data.pdf [file supp_tpc.15.00203_TPC2015-00203-LSBR2_Supplemental_Data.pdf]

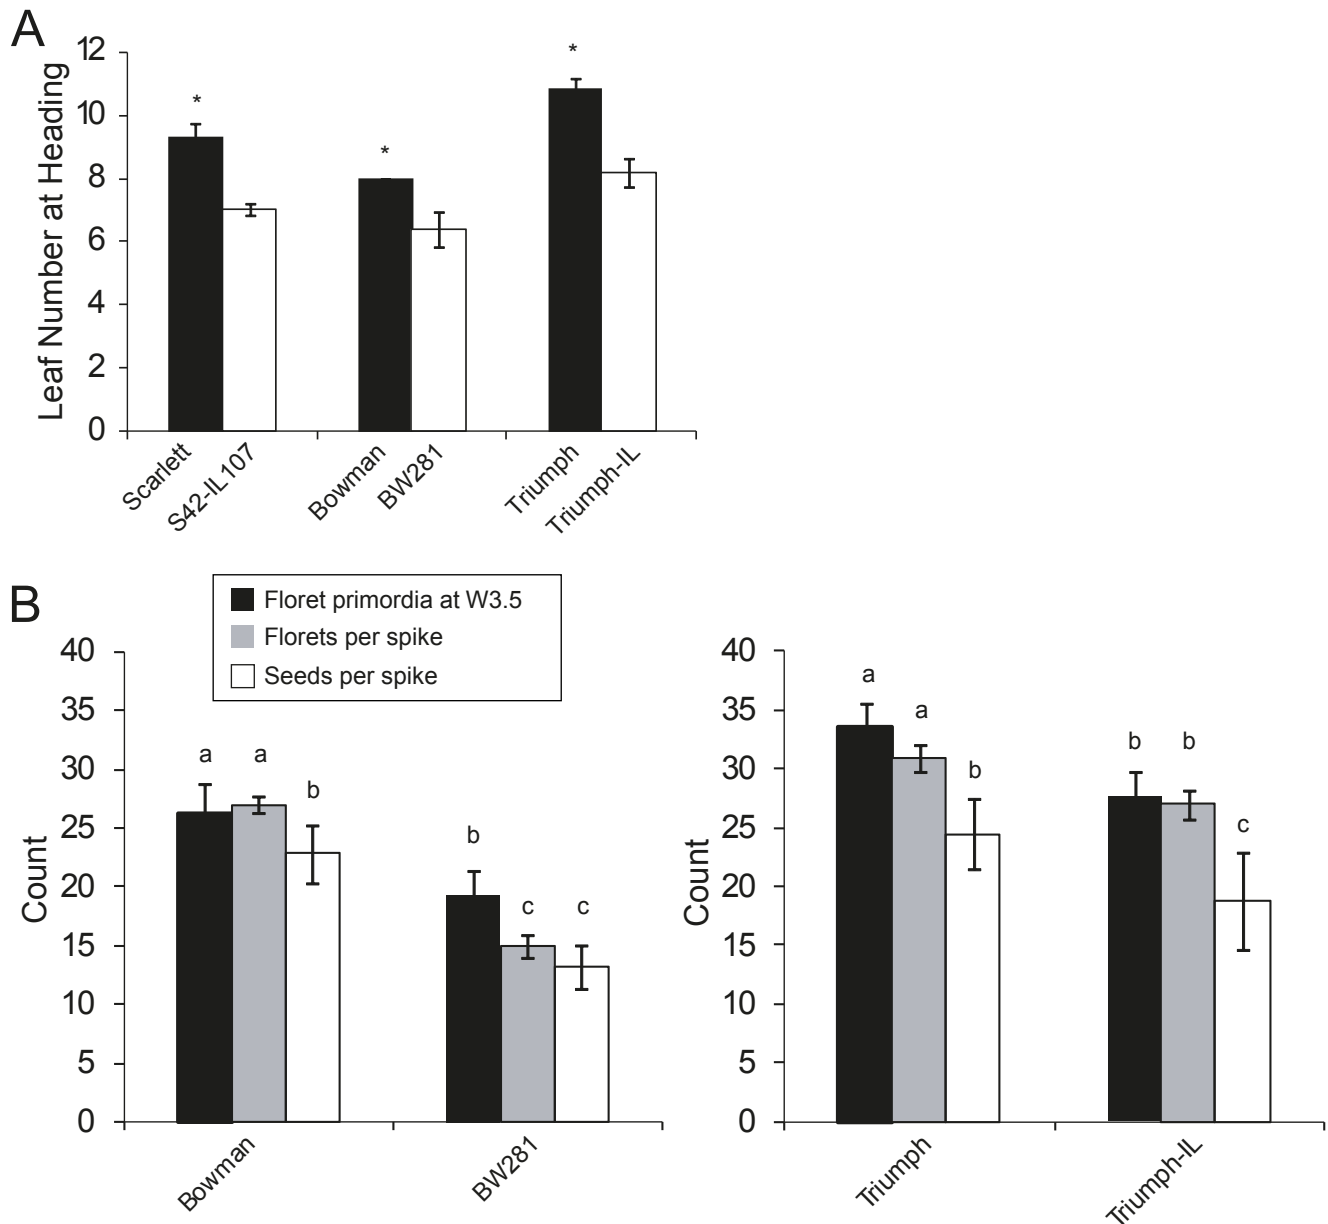

**Supplemental Figure 1: Development related phenotypes of Scarlett/S42-IL107, Bowman/BW281 and Triumph/Triumph-IL**

**(A)** Number of leaves emerged from the main shoot under long days (LDs) at the time of heading. **(B)** Phenotypes of the main shoot spike recorded at stamen primordium stage (W3.5, floret primordia per inflorescence) or at plant maturity (florets per spike, seeds per spike). Bars represent means  $\pm$  standard deviation over 5-15 plants. Significant differences ( $p < 0.05$ ) between spring barleys and derived *Ppd-H1* introgression lines and between spike related phenotypes are indicated as asterisks and small letters on top of the charts, respectively.

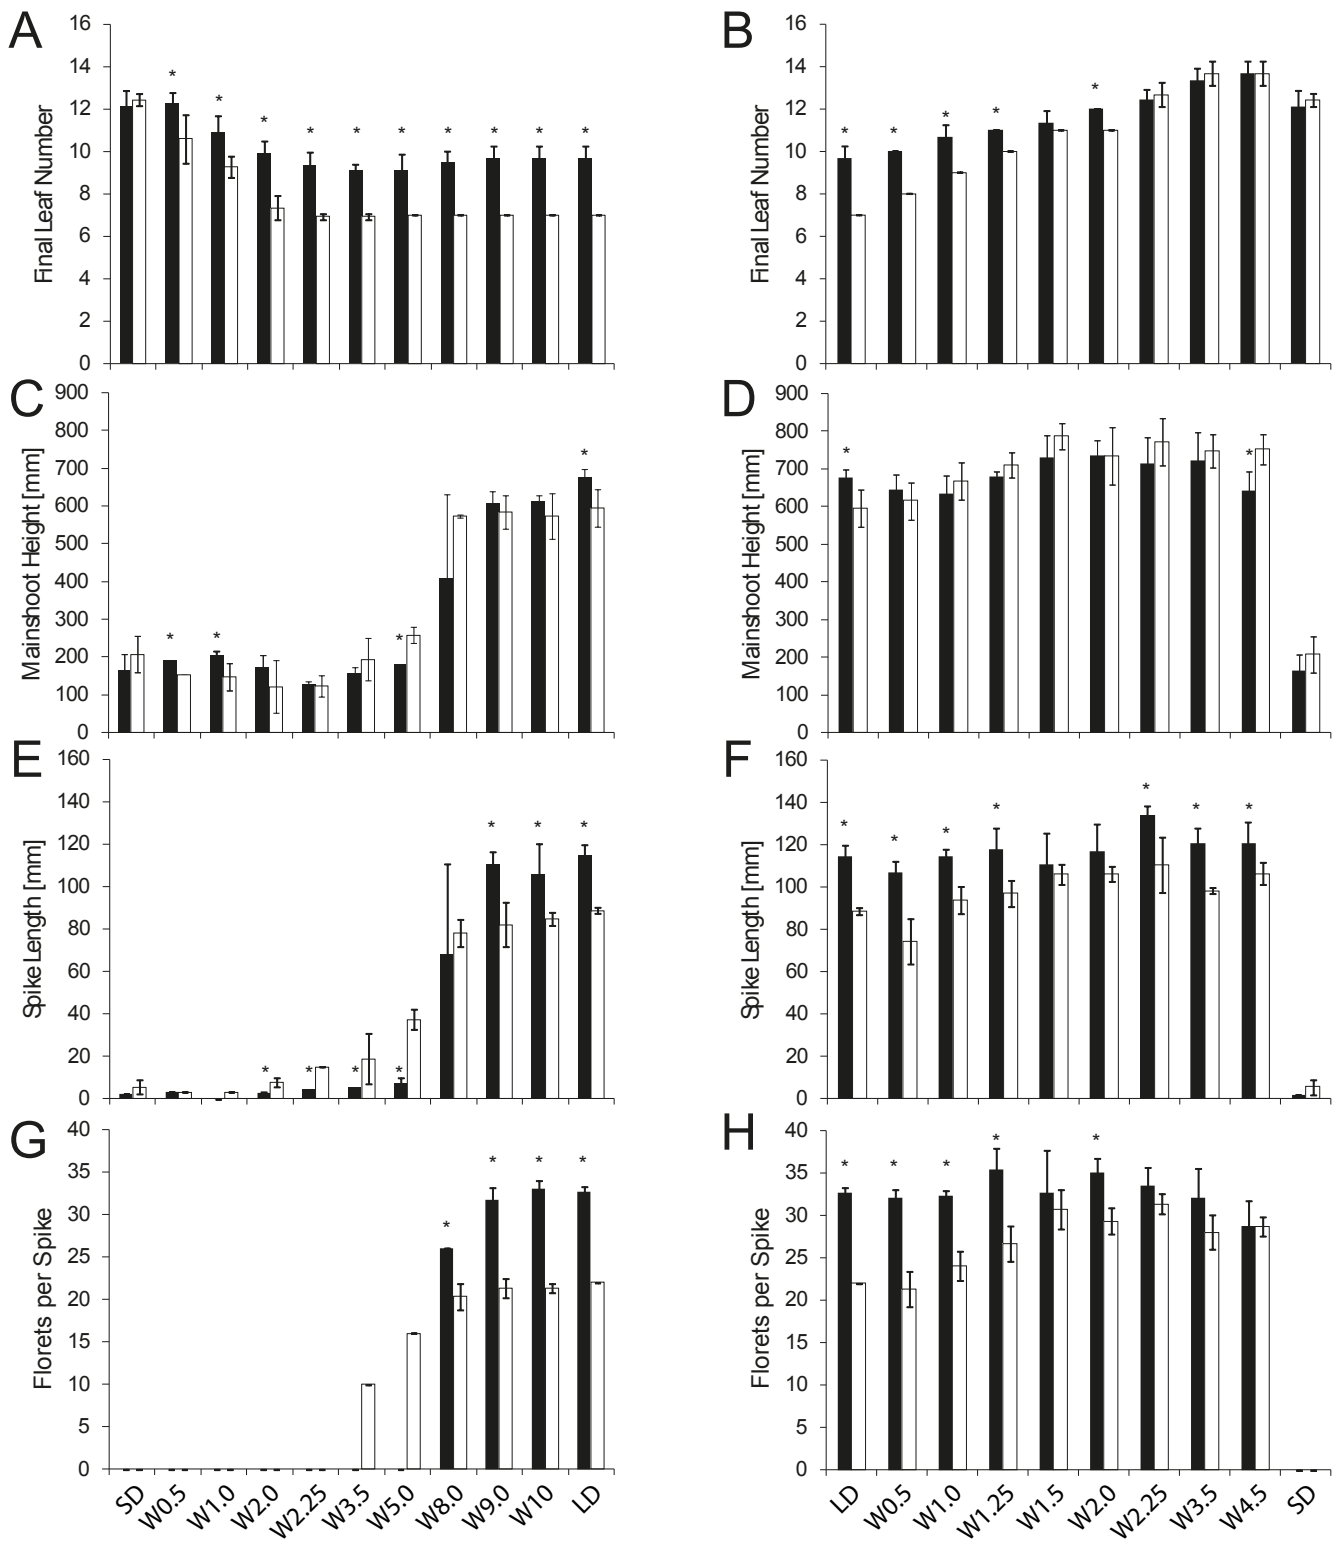

**Supplemental Figure 2: Effects of the photoperiod during plant development on leaf emergence, stem elongation and spike traits of Scarlett and S42-IL107**

Plants of Scarlett (black) and S42-IL107 (white) were grown under short-day (SD) or long-day (LD) conditions. At different stages of MSA development (W0.5 – W10), plants were transferred from (**left column**) LDs to SDs or from (**right column**) SDs to LDs and remained in the respective photoperiod until plant senescence. The following phenotypes of the main shoot were recorded for plants: (**A, B**) number of emerged leaves at heading or at main shoot senescence; (**C, D**) height; (**E, F**) spike length; (**G, H**) floret number per spike. Bars represent means  $\pm$  standard deviation over 3 plants. Significant differences ( $p < 0.05$ ) between genotypes transferred from SDs to LDs and vice versa at the same developmental stage are indicated by asterisks above bar graphs.



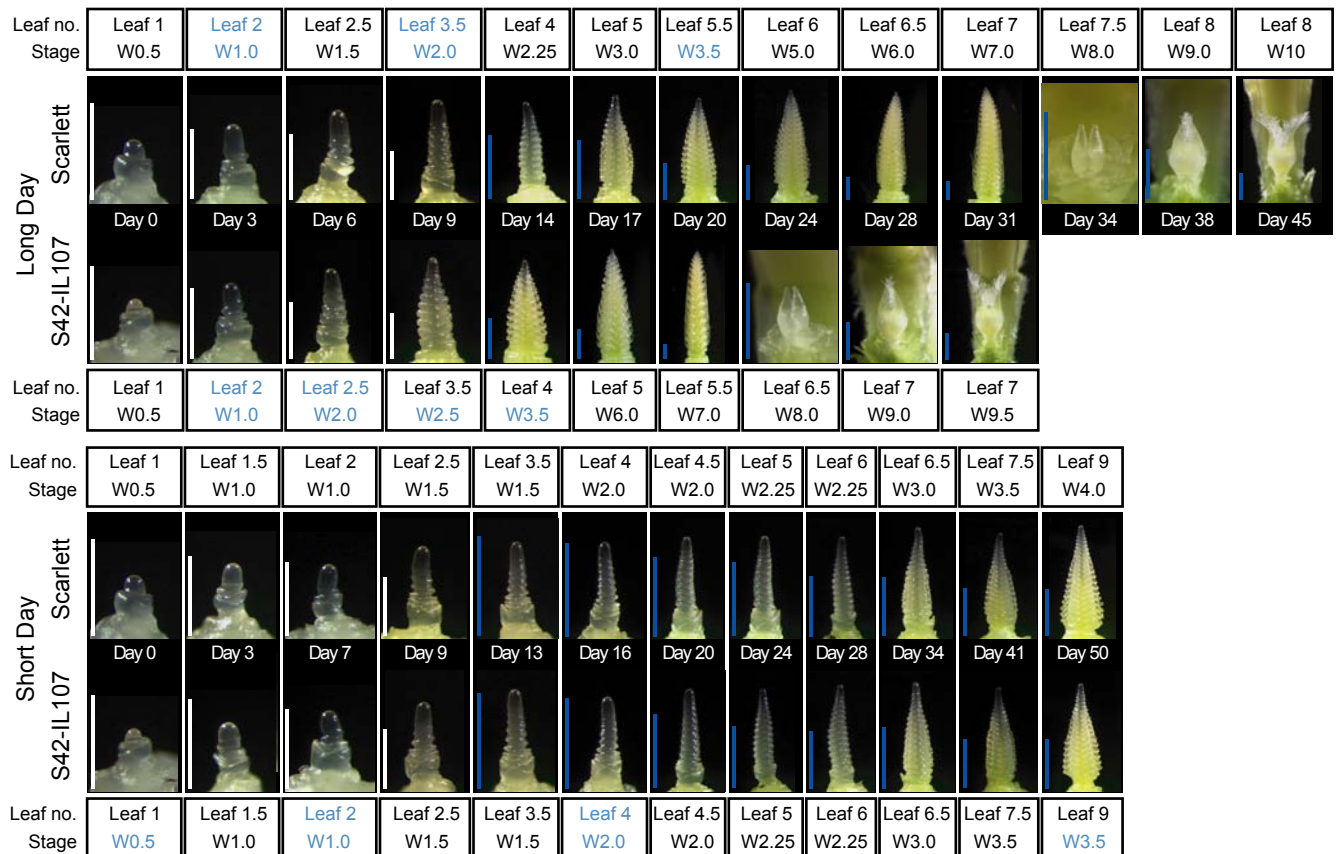

### Supplemental Figure 3: Development of the main shoot apex of Scarlett and S42-IL107

Developmental stage of the apex (W: Waddington stage) and number of leaves emerged from the main shoot are reported. Plants were grown under short-day conditions (SD) or transferred to long days (LDs) seven days after germination (Day 0). Blue labels indicate stages, at which leaf and apex samples were harvested for transcriptome profiling using RNA sequencing. White bars (500µm), blue bars (1mm).

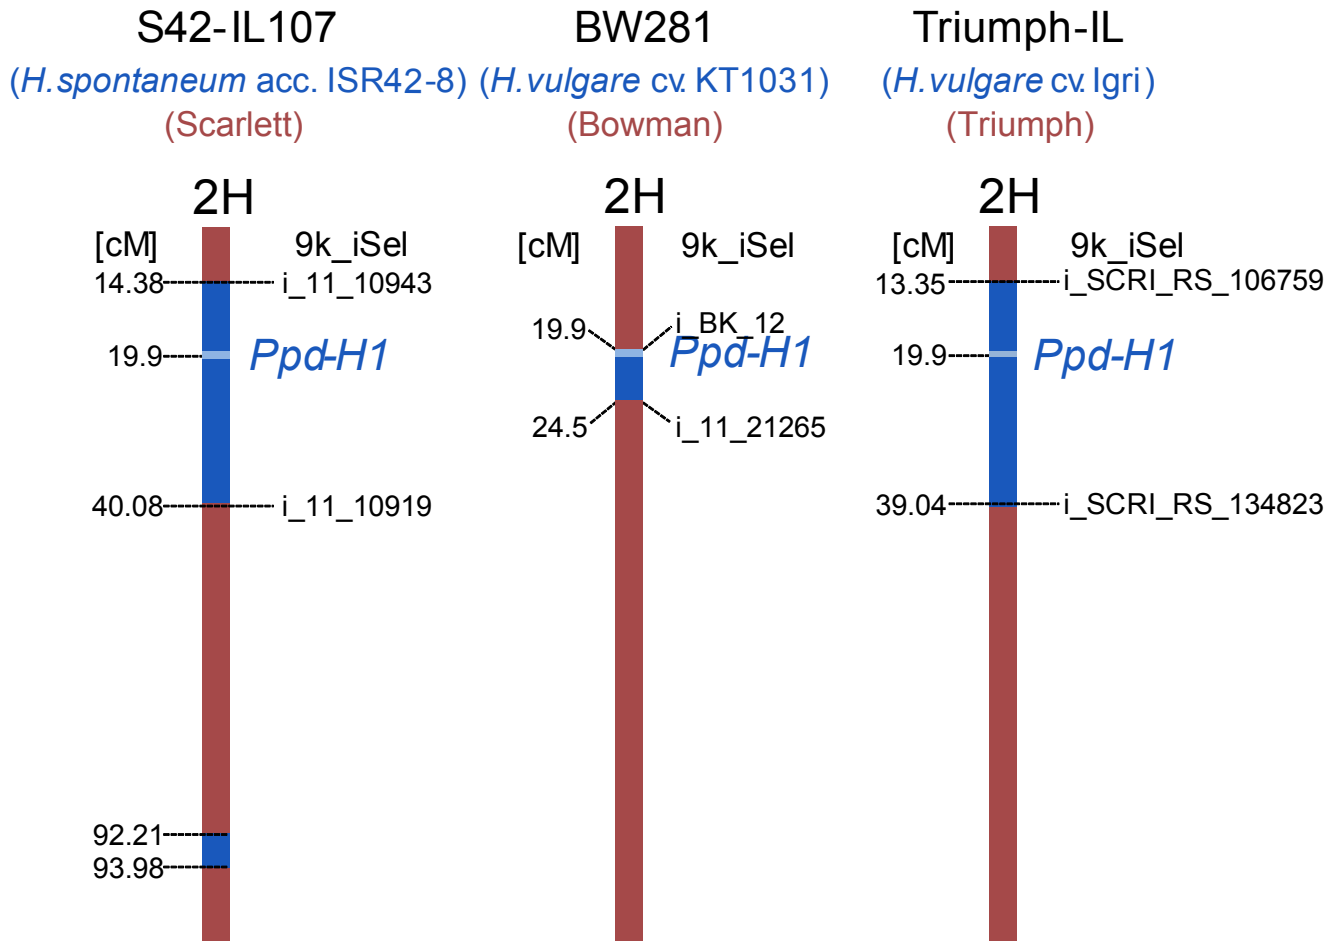

**Supplemental Figure 4: Size and flanking markers of *Ppd-H1* introgressions on chromosome 2H.**

Donor parents for the photoperiod-responsive *Ppd-H1* allele of the introgression lines and their respective spring barley background genotypes are indicated above each chart. Introgression lines were genotyped with the 9k-iSelect chip from Illumina. Flanking marker positions of the introgressions are given relative to the POPSEQ map (Marscher et al., 2013).

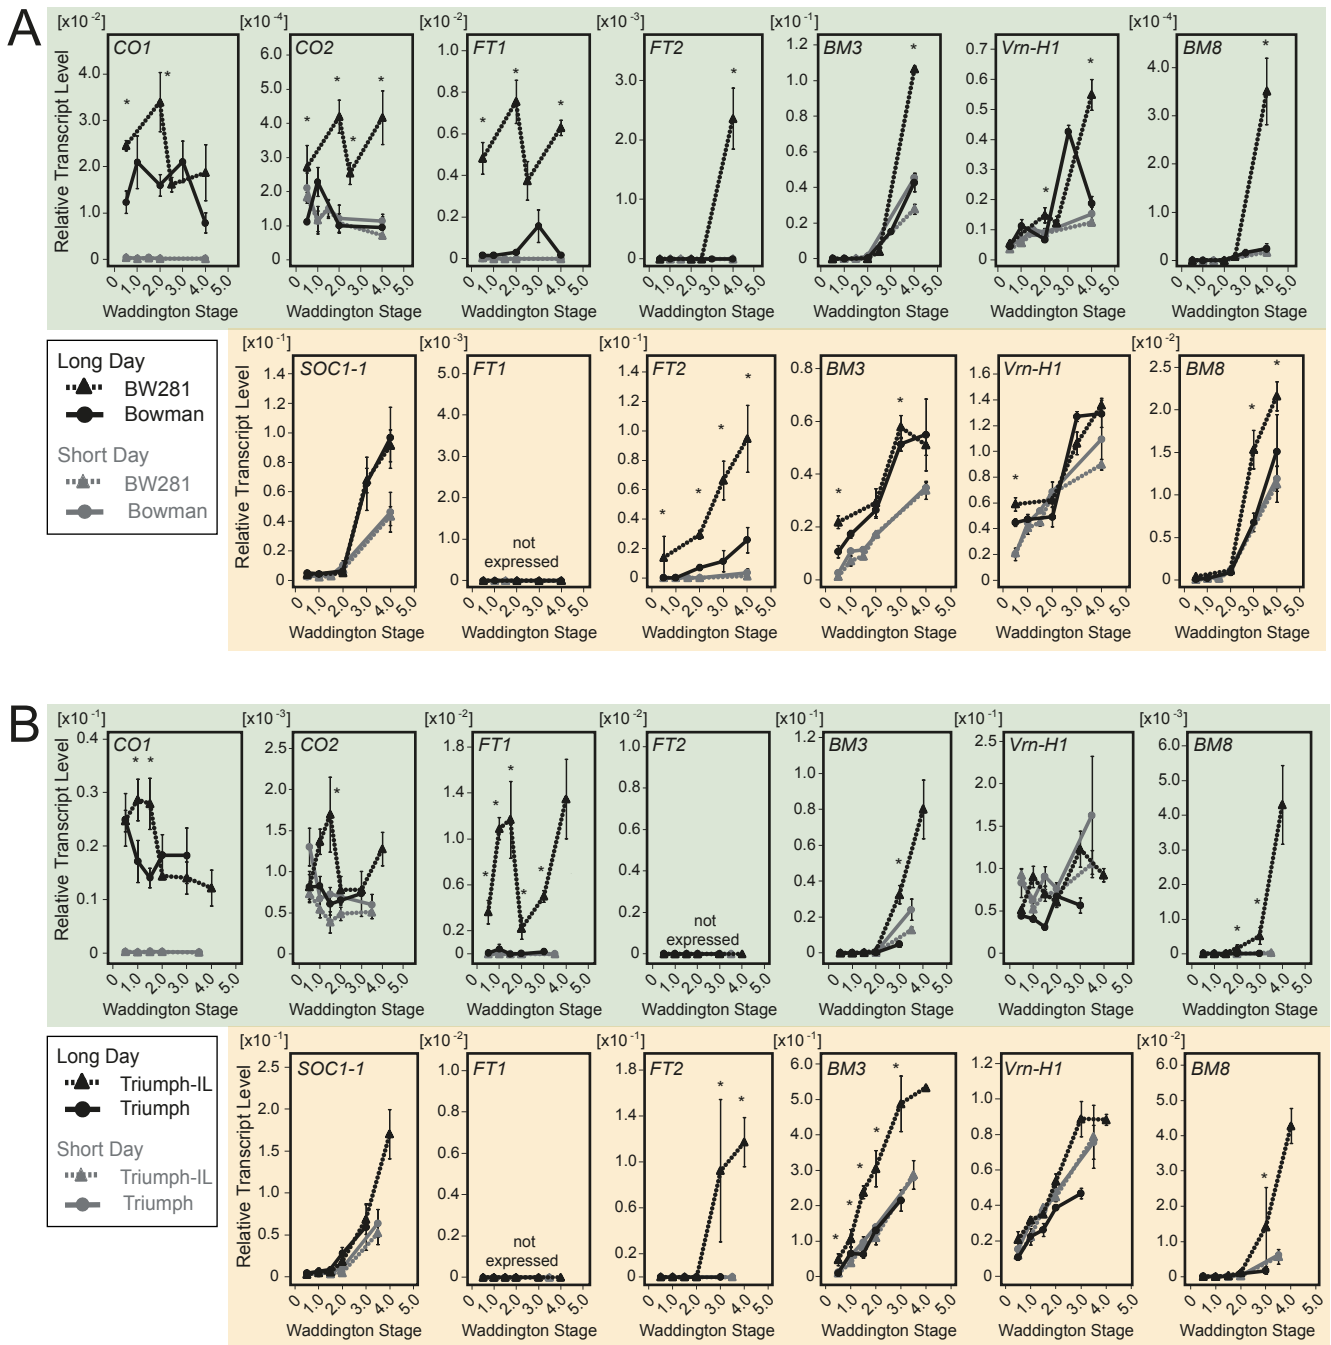

**Supplemental Figure 5: Validation of transcript levels in leaves and shoot apices of Bowman/ BW281, Triumph/Triumph-IL**

Quantification of transcript levels by quantitative real time PCR (RT-qPCR) in leaf samples (green) and samples enriched for apex tissue (orange) at different stages of plant development. Samples were harvested from the barley genotypes (A) Bowman and BW281 and (B) Triumph and Triumph-IL. Transcript levels are demonstrated relative to the transcript abundance of *Actin*. Error bars indicate the standard deviation over three biological and two technical replicates. Asterisks highlight significant differences ( $p < 0.05$ ) between transcript levels of BW281 and Bowman or Triumph-IL and Triumph, respectively, when plants were at the same developmental stage and grown under long-day conditions.

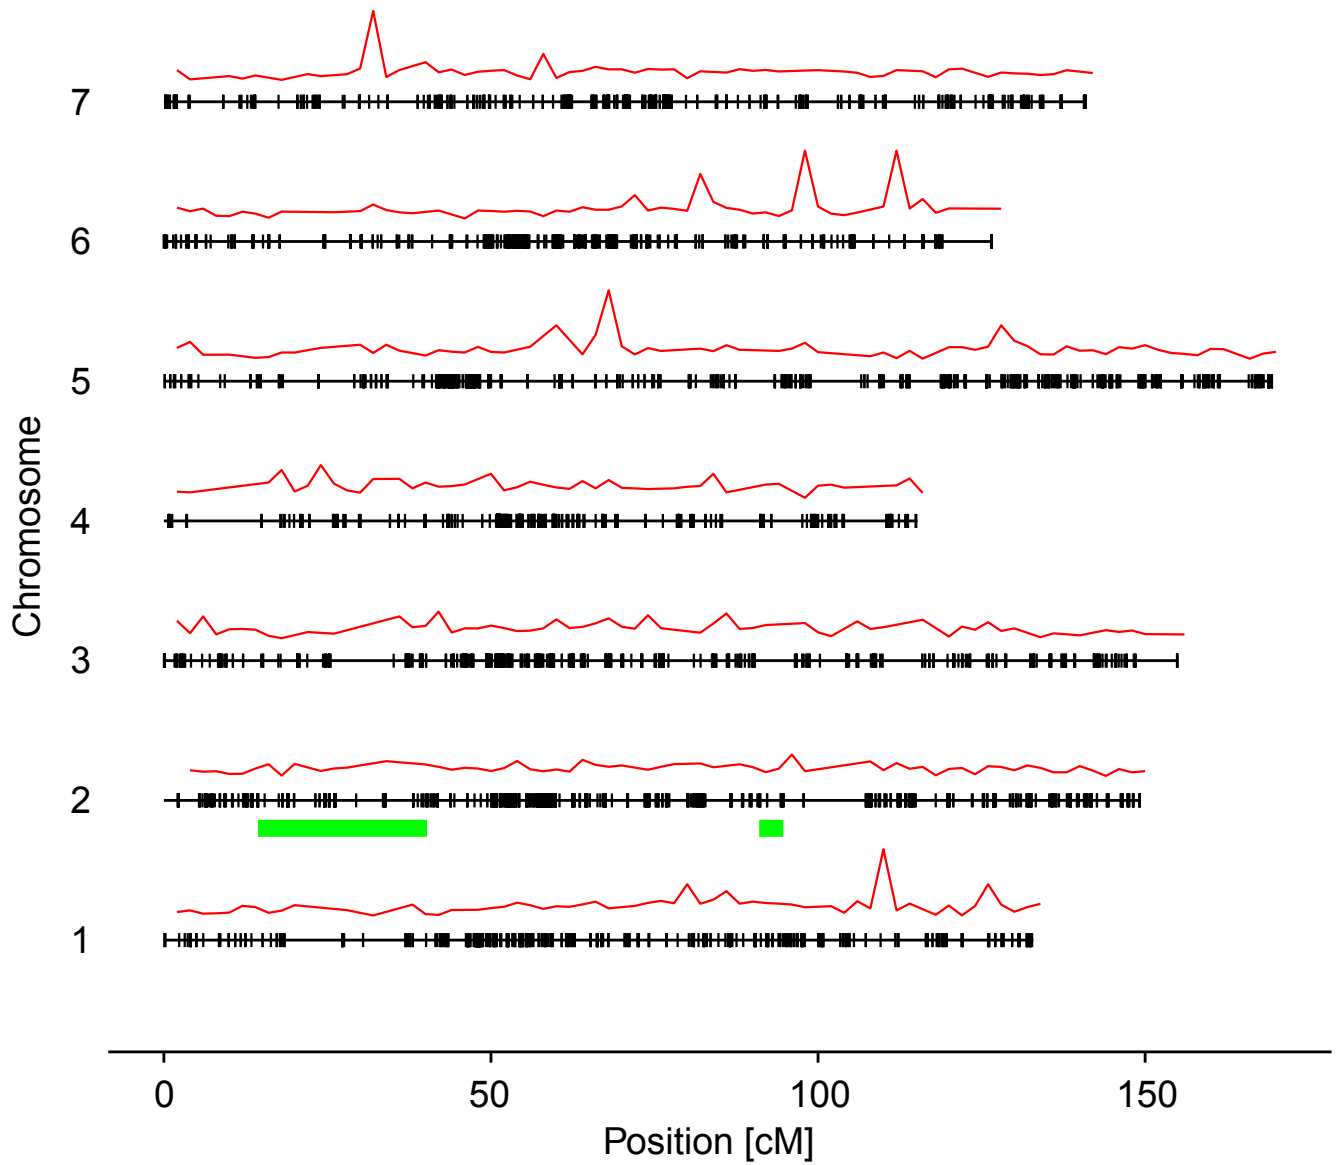

**Supplemental Figure 6: Distribution and density of differentially expressed transcripts (DETs) along the barley chromosomes.**

Seven barley chromosomes are depicted as horizontal black lines. The DETs are shown as vertical black lines plotted on the chromosomes. Location of the S42-IL107 introgression region is shown as green rectangles below the chromosome 2H. The density of the DETs is plotted as red lines above the chromosomes. Positions are given in centimorgans (cM) according to the PopSeq map (Mascher et al., 2013).

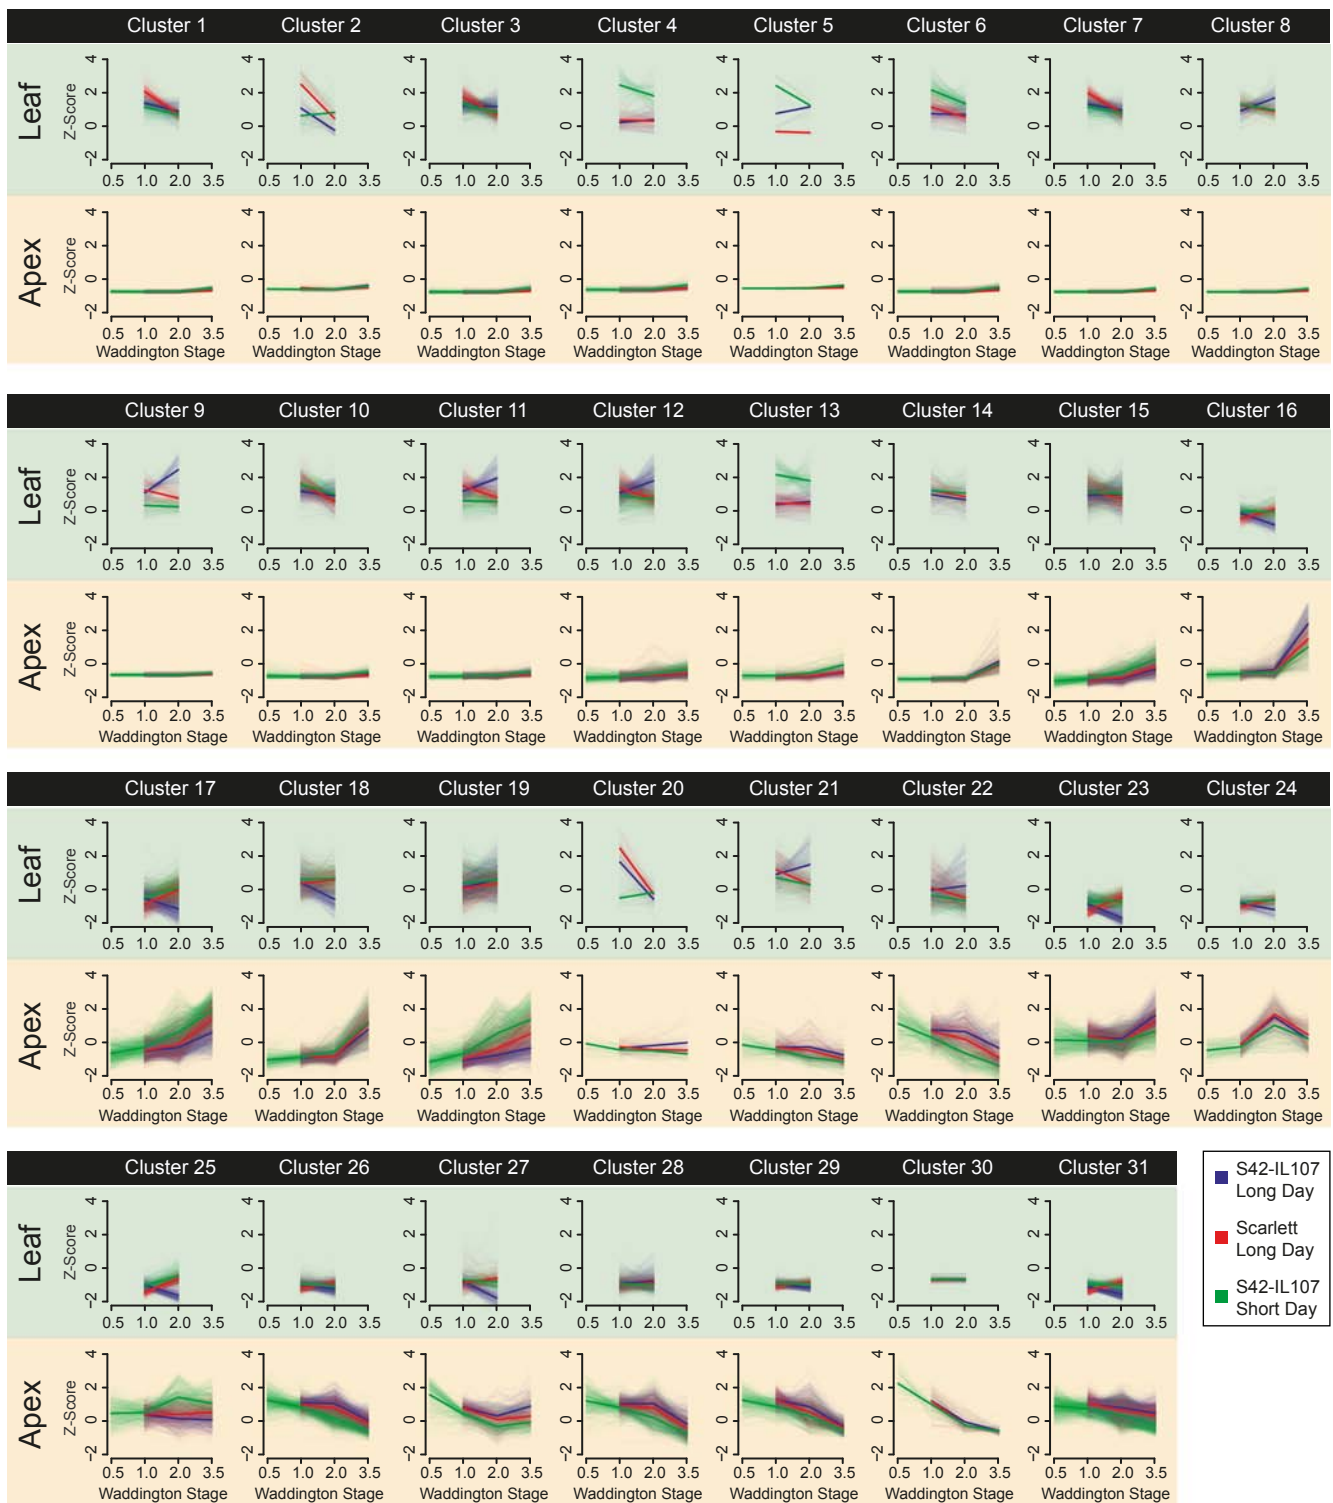

### Supplemental Figure 7: Expression profiles of 7604 DETs in 31 coexpression clusters

Coexpression clusters of 7604 differentially expressed transcripts (DET). Expression levels for individual transcripts (light colors) and mean expression level across all transcripts within each cluster (bright color) were plotted. Coexpression plots depict transcript expression patterns in leaves (green) and apices (orange) as mean centered and scaled transcript levels (Z-Score). Detailed statistics for each cluster are presented in Supplemental Table 20.

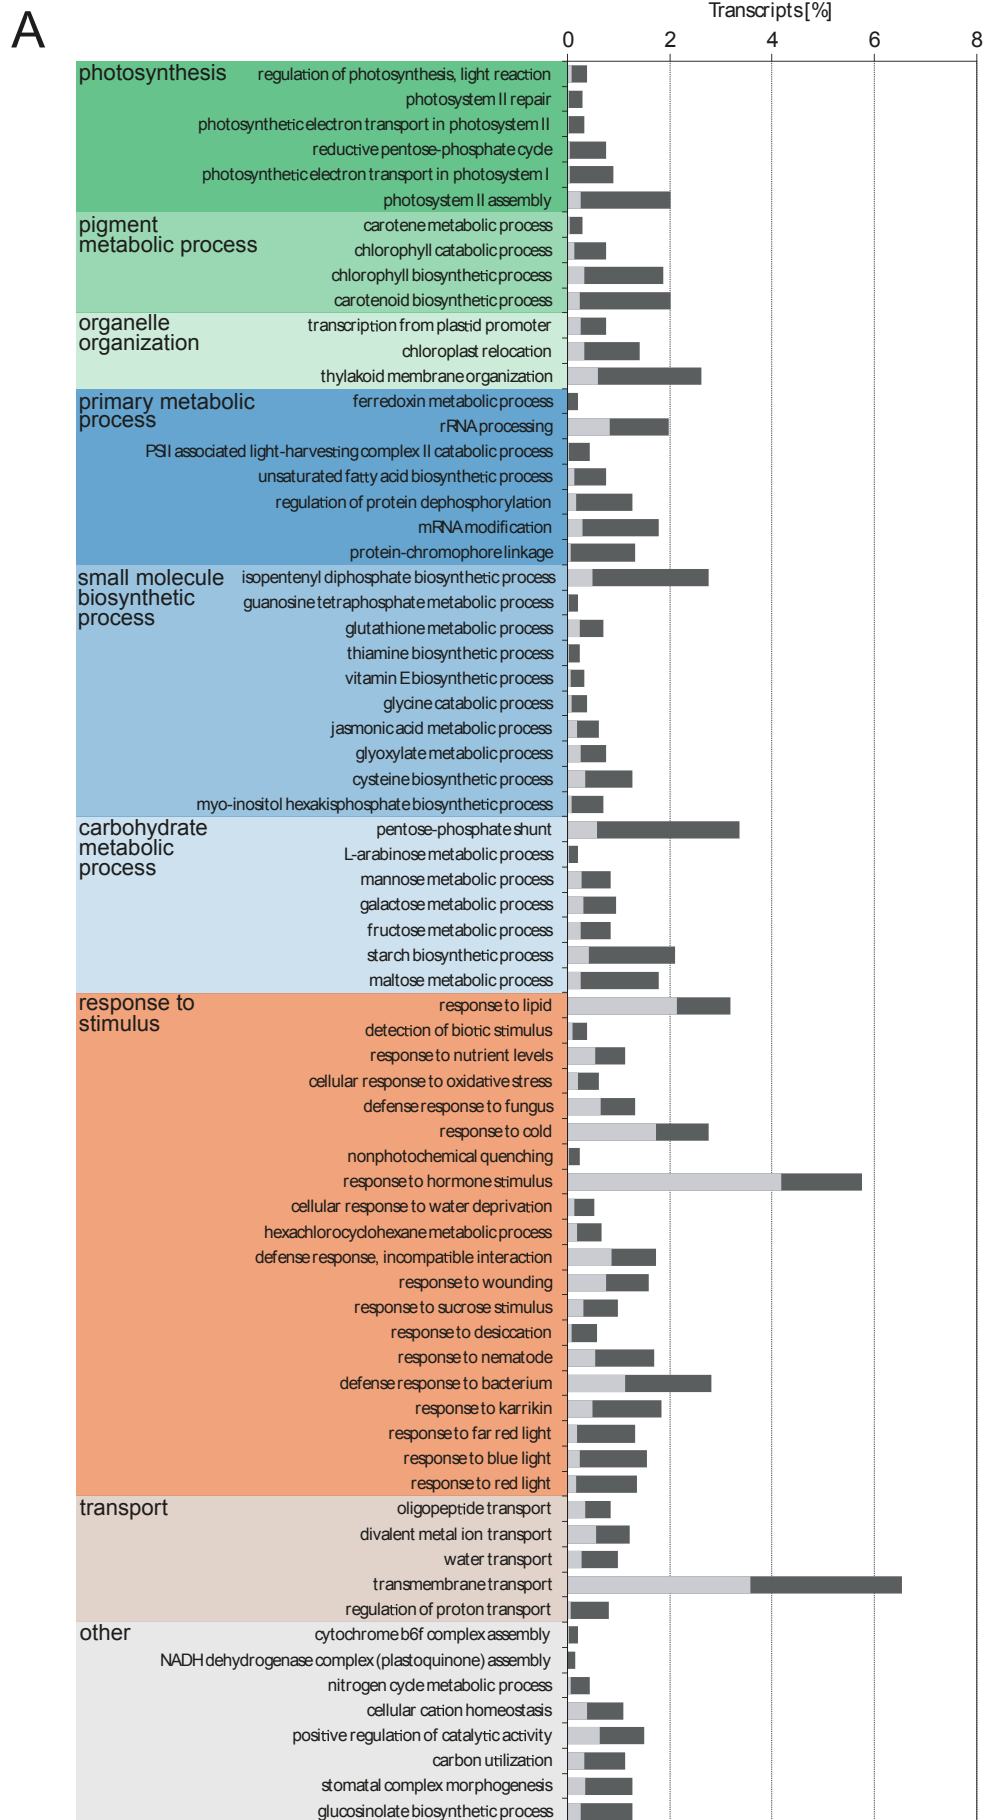

**Supplemental Figure 8 (part 1): Overrepresentation of Gene Ontology (GO) terms among transcripts in coexpression clusters I-III**  
 Legend see next page

B

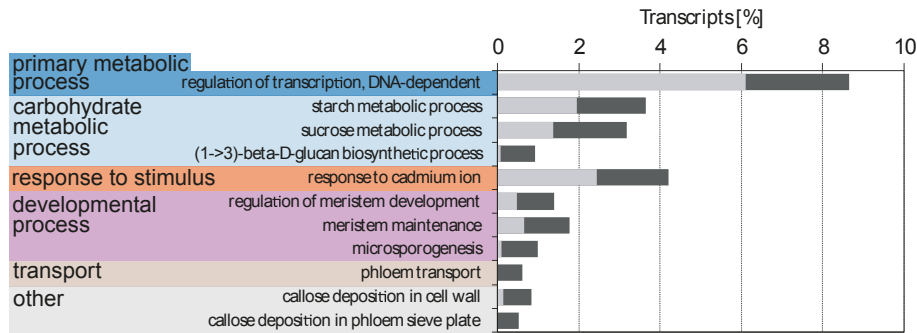

C

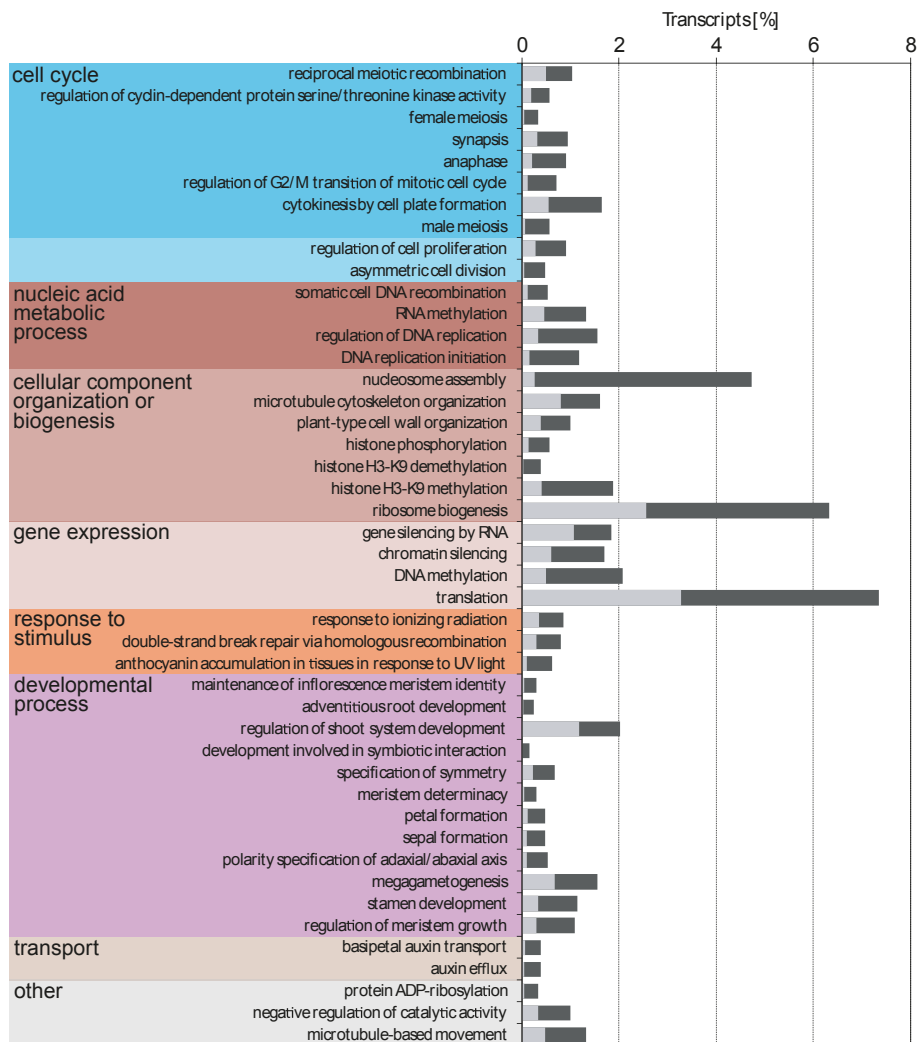

### Supplemental Figure 8 (part 2): Overrepresentation of Gene Ontology (GO) terms among transcripts in coexpression clusters I-III

Overrepresented GO terms assigned to biological processes for transcripts coexpressed within (A) cluster I, (B) cluster II and (C) cluster III, respectively. Clusters represent transcripts predominantly expressed in leaves (cluster I), shoot apices (cluster III) or equally expressed in both tissues (cluster II). Significant (FDR<0.05) leaf nodes of the GO-tree were summarized to common parental GO-terms (colored). Bars indicate the relative abundance of transcripts assigned to the GO-terms in the test set (dark grey) and the reference set (light grey), respectively.

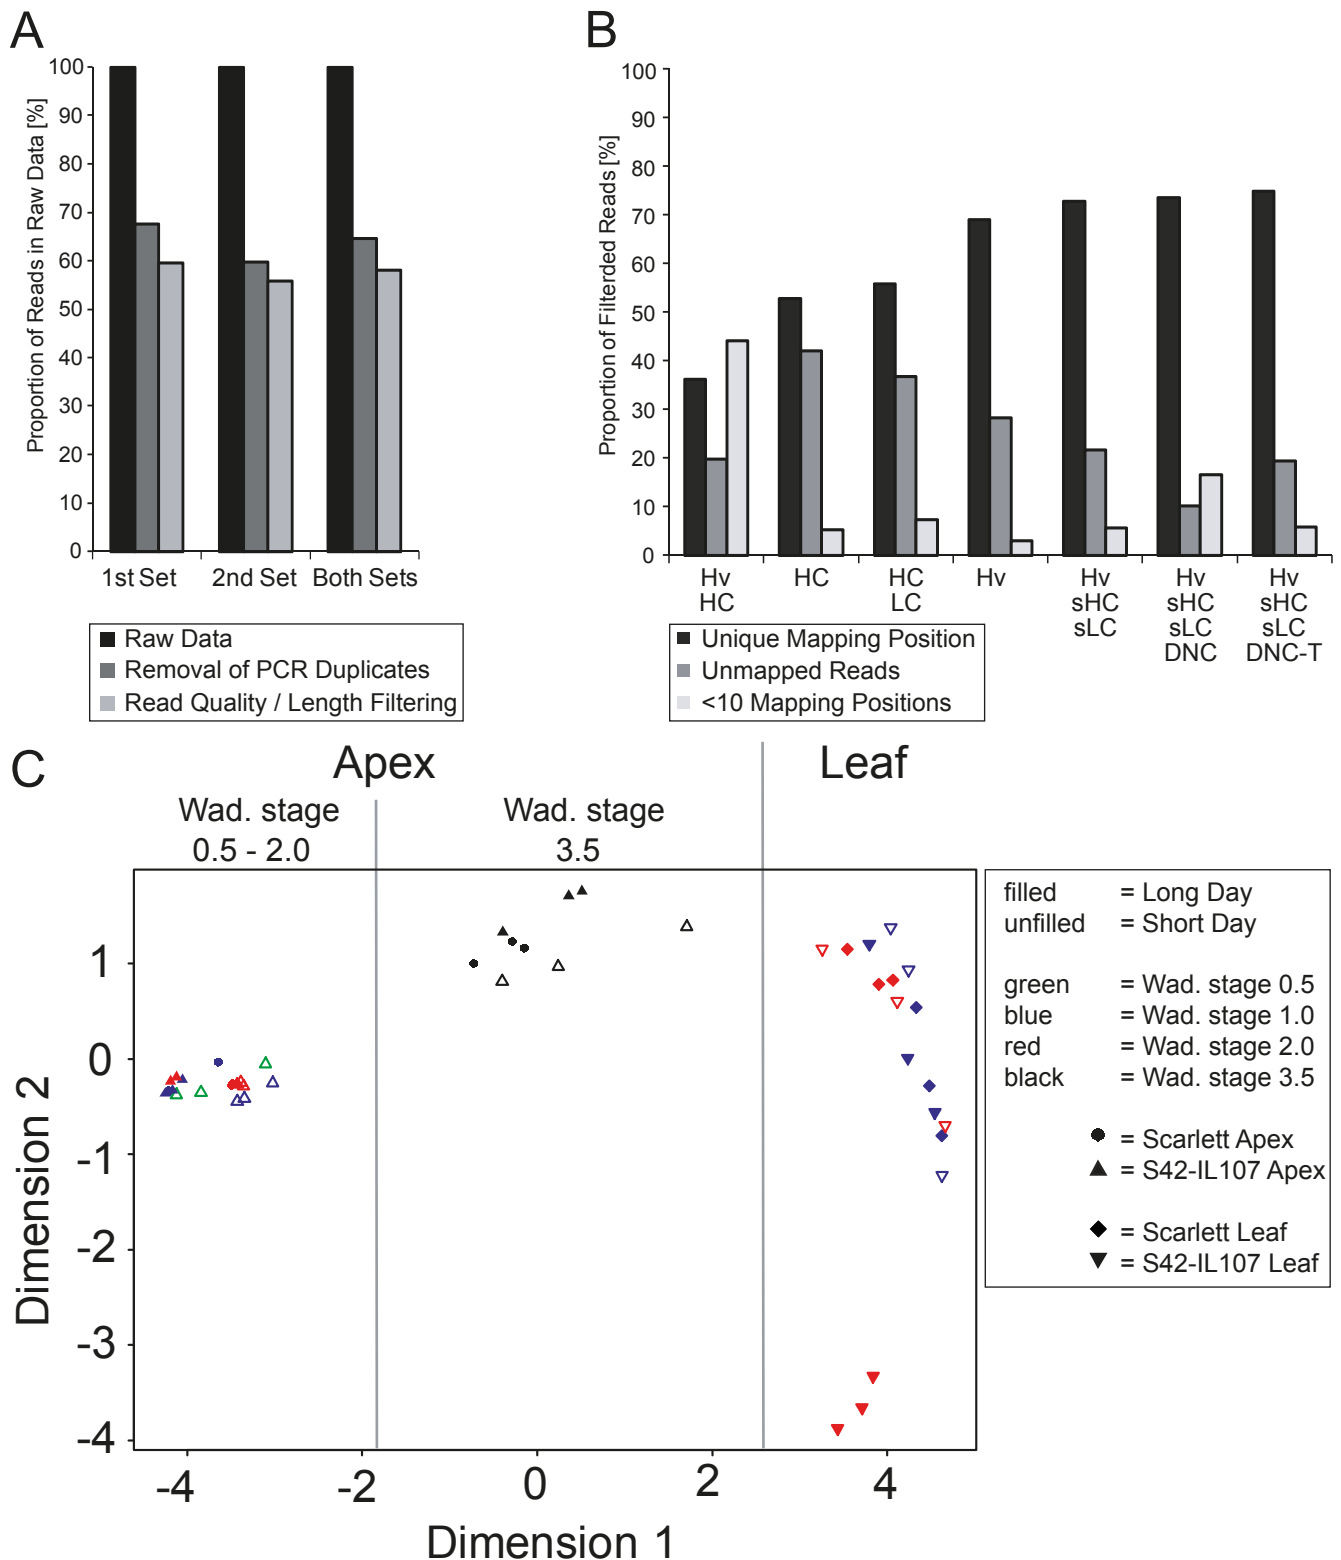

### Supplemental Figure 9: Overview of RNA sequencing statistics

(A) Quality- and length-based filtering of raw sequencing reads (100bp, single-end, Illumina), derived from two independent sequencing runs. Reads of libraries A to X (1st set) and of libraries A1-AE1 (2nd set) retained after filtering. See Supplemental Table 18 for detailed information on the libraries. (B) Proportion of filtered reads mapping to the reference sets of different transcript combinations. Hv: barley NCBI UniGene set; HC: high confidence gene set; LC: low confidence gene set; sHC/sLC: selected subset of unique HC or LC; DNC, *de novo* contigs assembled from unmapped Illumina reads; DNC-T, selected *de novo* contigs with BLASTx hit in the Triticeae. (C) Unsupervised clustering of RNA samples in two dimensions by multidimensional scaling.



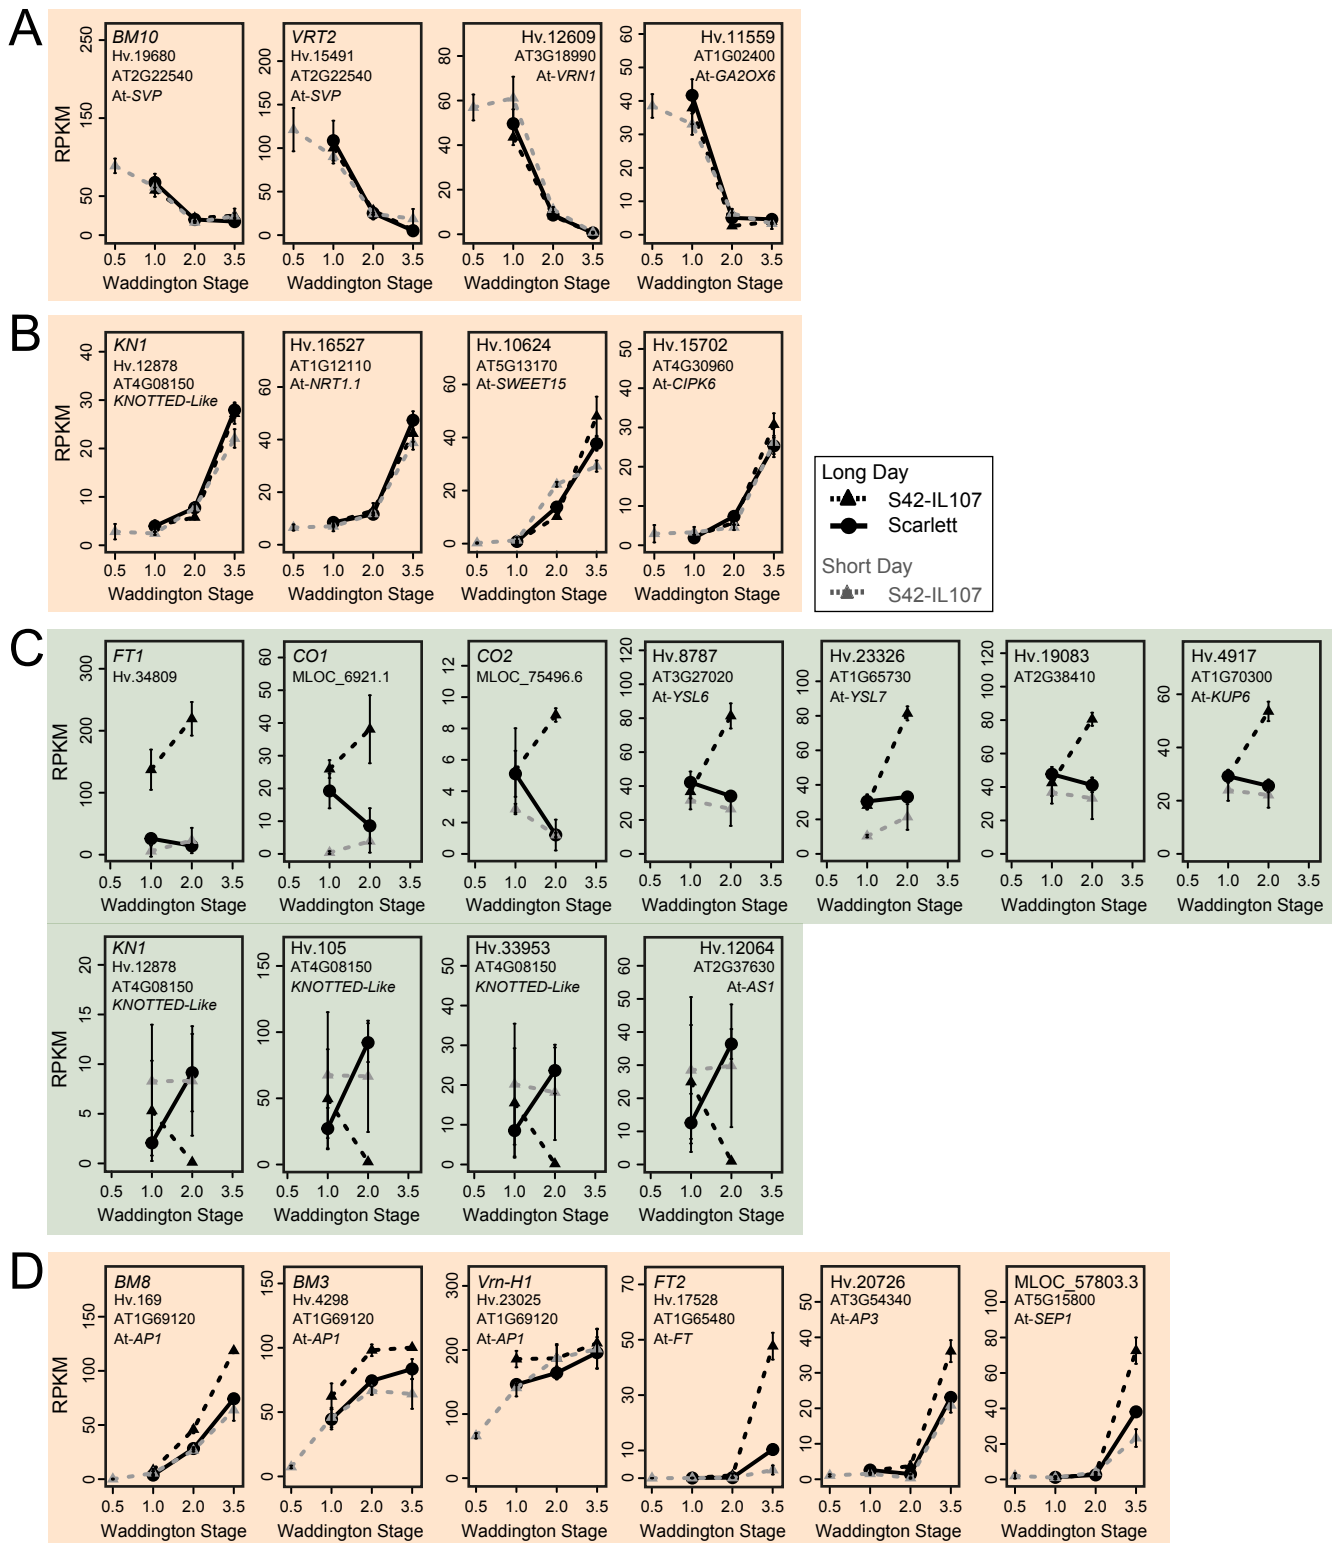

**Supplemental Figure 10: Expression patterns of selected transcripts in leaves and shoot apices of Scarlett and S42-IL107 determined by RNA sequencing (RNA-seq)**

RNA-seq derived expression data of transcripts (A) downregulated or (B) upregulated during MSA development independent of the genotype and photoperiod or differentially regulated between photoperiods and between genotypes in (C) leaves or (D) shoot apices. Normalized expression values are reported in reads per kilo base per million (RPKM). Error bars indicate standard deviation across two to three independent RNA samples.

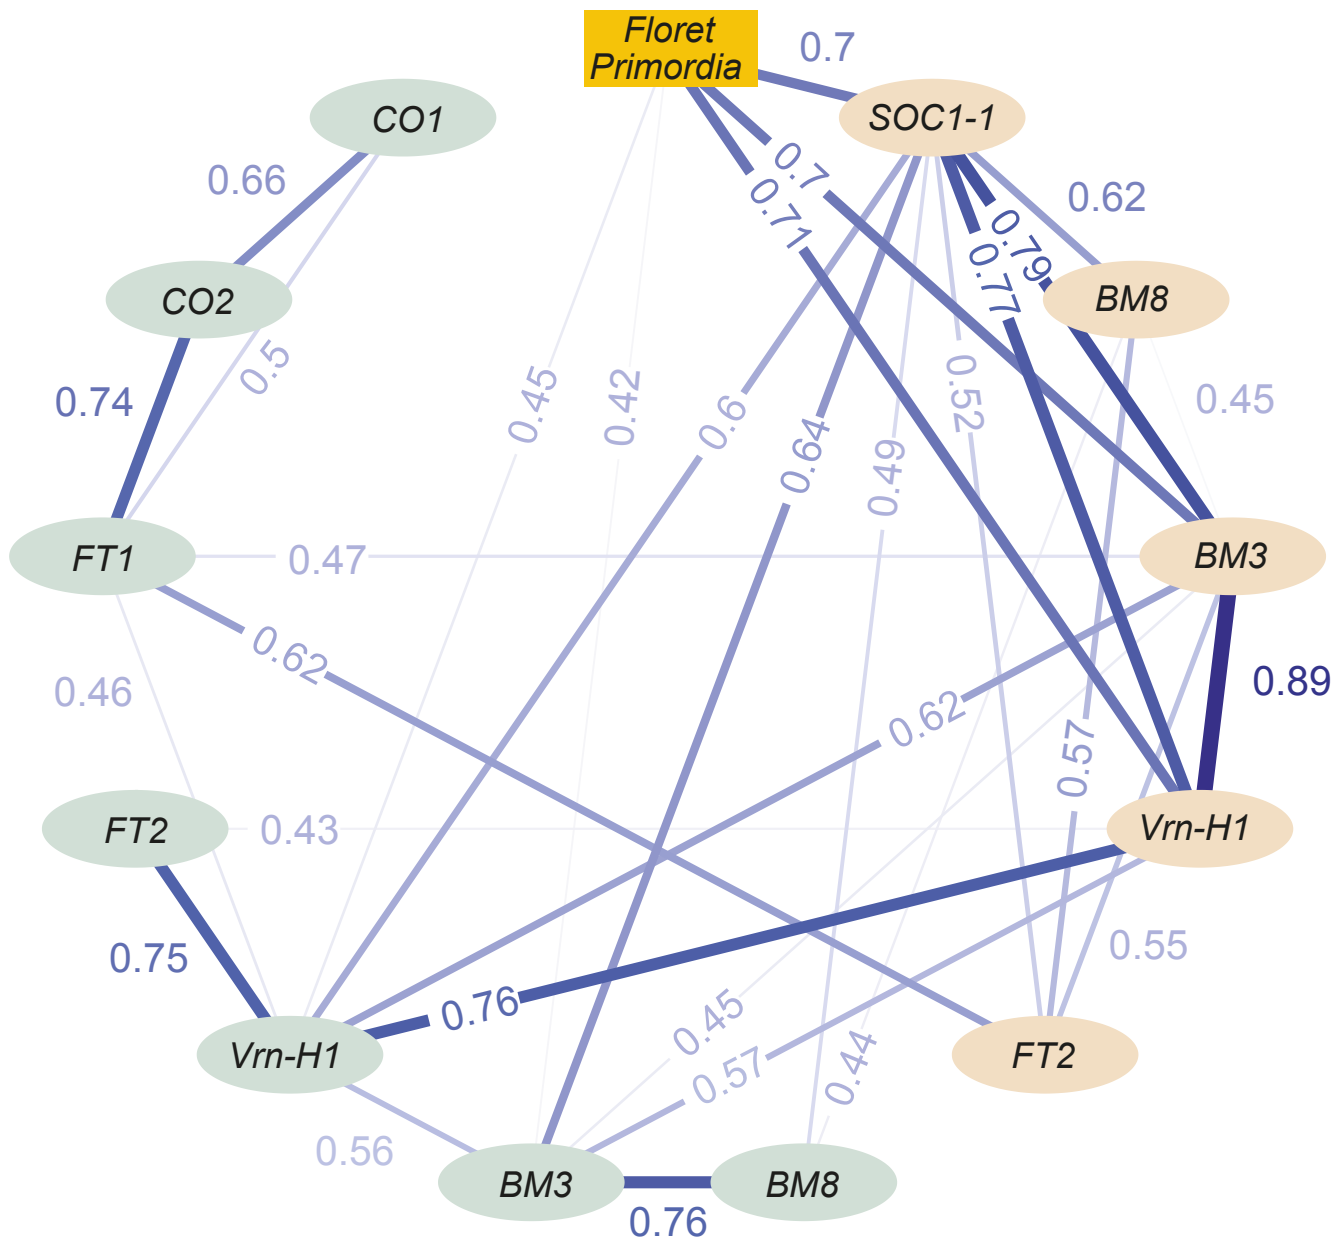

**Supplemental Figure 11: Correlation network for gene expression data in leaves and shoot apices**

Correlation network between transcript levels of flowering time genes in leaf and shoot apex samples and number of floret primordia emerged at the shoot apex during early stages of shoot apex development. Transcript abundance was determined by RT-qPCR in leaves (green ellipses) and shoot apex enriched tissue (orange ellipses) of Scarlett, Bowman, Triumph and their derived *Ppd-H1* introgression lines (see also Figure 3D+E and Supplemental Figure 5). Pearson correlation coefficients of  $r > |0.4|$  and  $FDR < 0.05$  are indicated as blue lines connecting the individual transcripts.

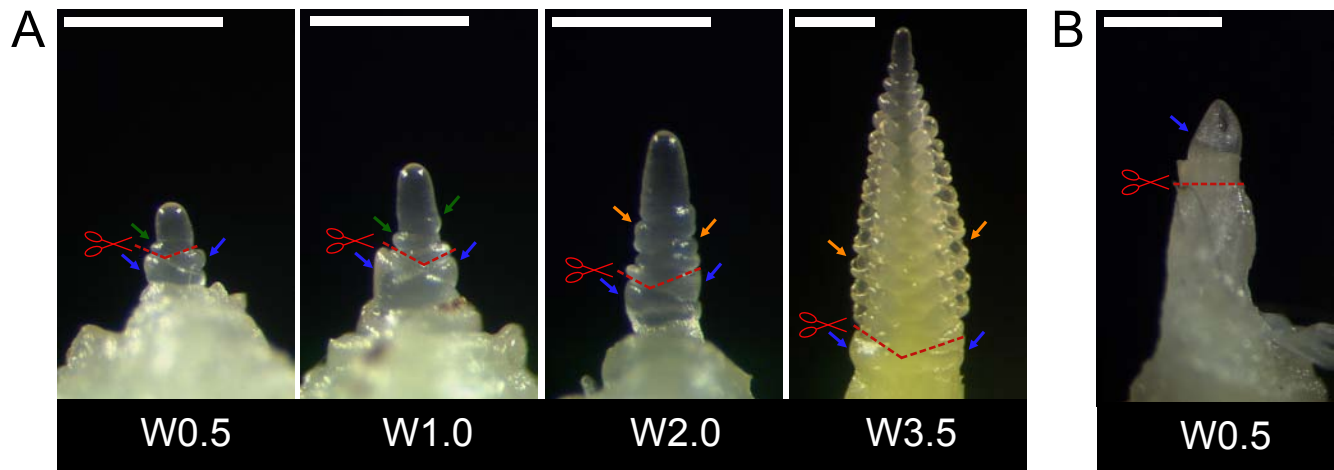

**Supplemental Figure 12: Representative main shoot apices dissected for RNA extraction**

Total RNA was extracted from pools of isolated shoot apices including the tissue above the red dashed lines. Waddington stages (W) of harvested shoot apices are indicated below the pictures. White bars represent 500µm. **(A)** Shoot apex samples harvested for RNA sequencing comprised dissected tissues of the apical dome, young leaf primordia (green arrows) and floret primordia (orange arrows). Older leaf primordia (blue arrows) and basal parts of the shoot apex were excluded. **(B)** Apex enriched tissue harvested for RT-qPCR analysis at different stages of development also included older leaf primordia and basal parts of the shoot apex as indicated for a vegetative shoot apex at W0.5.

A

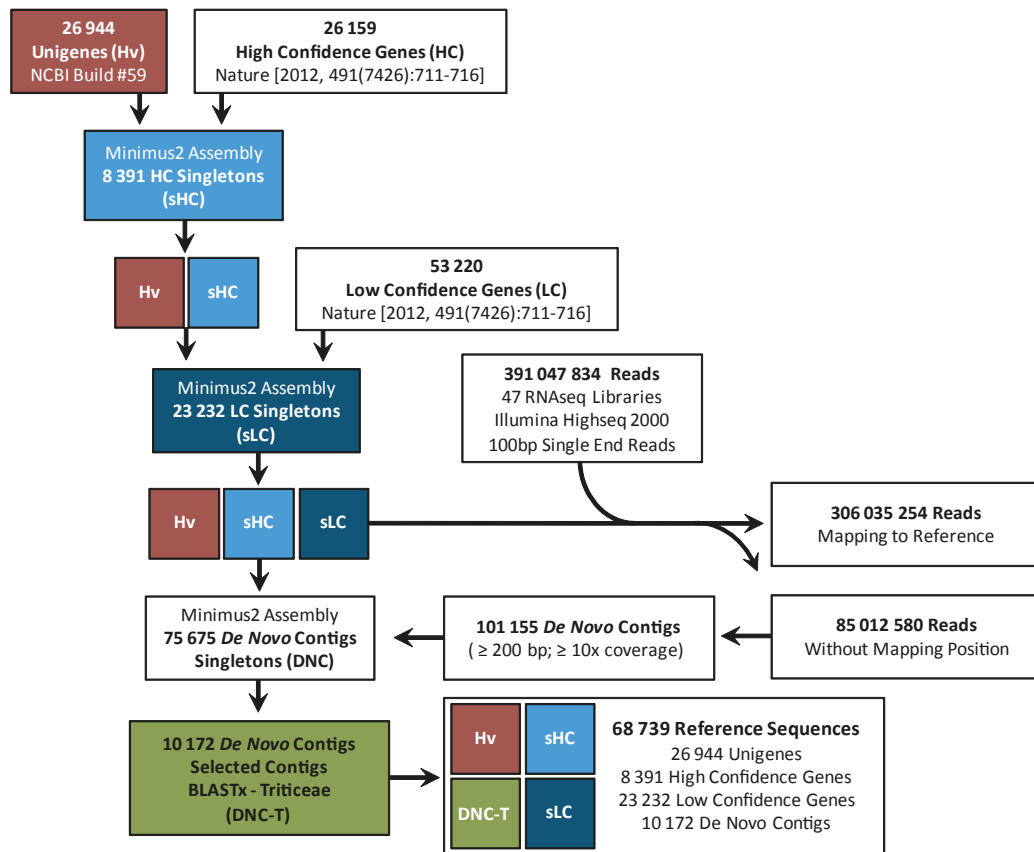

B

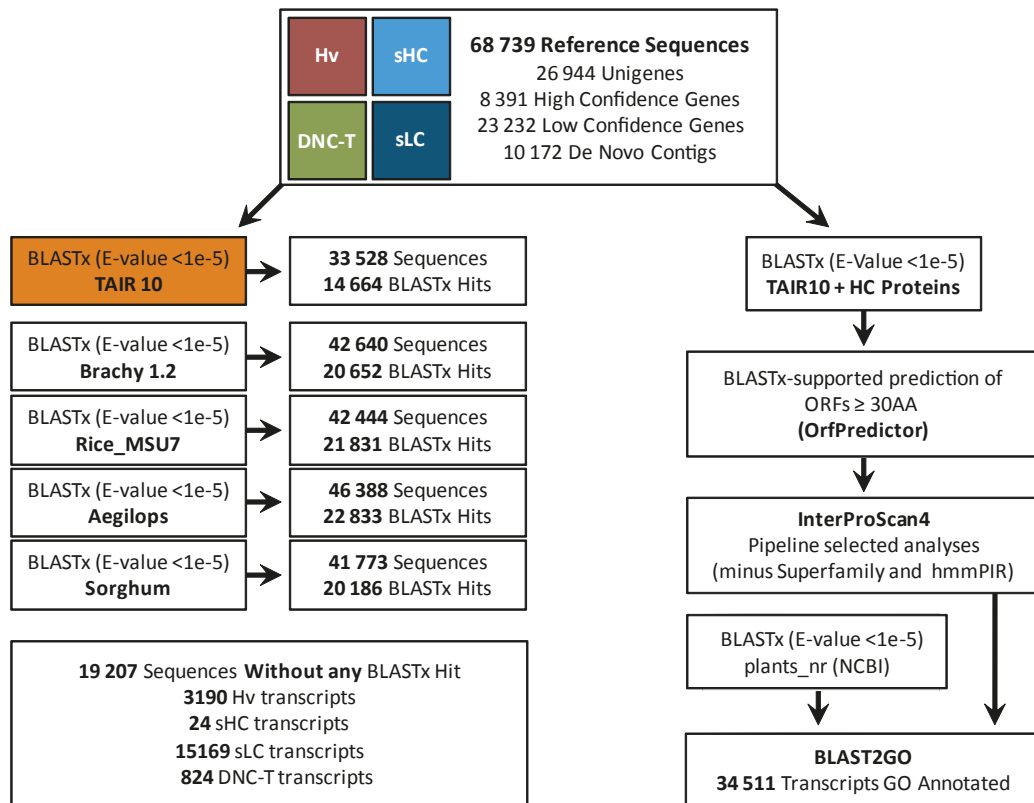

Supplemental Figure 13 (part 1): Schematic representation of the RNA sequencing pipeline Legend see next page

C

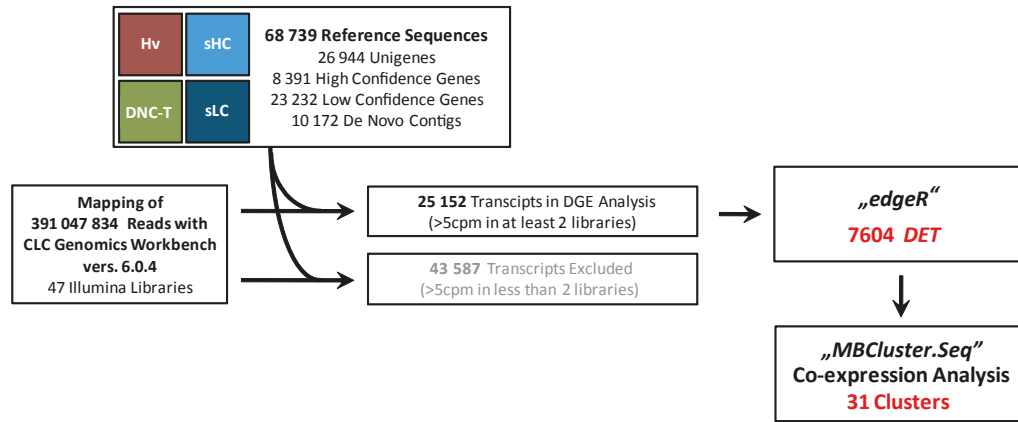

**Supplemental Figure 13 (part 2): Schematic representation of the RNA sequencing pipeline**

**(A)** Selection of transcripts used as reference sequences in the read mapping step prior to differential gene expression analysis. **(B)** Annotation of transcripts in the reference set is based on BLASTx results against different plant protein databases (left panel) and retrieval of Gene Ontology terms with Blast2GO software (right panel). **(C)** Summary of the differential gene expression and coexpression analysis using the edgeR- and MBCluster.Seq-packages of the R statistical software, respectively. DET: Differentially expressed transcripts; Hv, Unigenes: Barley NCBI UniGene set; HC: High confidence gene set; LC: Low confidence gene set; sHC/sLC: selected subset of unique HC or LC.

**Supplemental Table 1: Slopes of broken-line regressions performed on MSA development and floret primordia induction in Scarlett and S42-IL107 under SD and LD**

| Phenotype                                      | Photoperiod | Genotype  | Segment of Regression Line | Slope        | St.Err. | Upper 95%-CI <sup>1</sup> | Lower 95%-CI <sup>1</sup> |
|------------------------------------------------|-------------|-----------|----------------------------|--------------|---------|---------------------------|---------------------------|
| Shoot apex development<br>(see Fig. 1C)        | Long day    | Scarlett  | <b>segment 1</b>           | <b>0.118</b> | 0.010   | <b>0.098</b>              | <b>0.138</b>              |
|                                                |             |           | <b>segment 2</b>           | <b>0.246</b> | 0.006   | <b>0.234</b>              | <b>0.258</b>              |
|                                                |             |           | segment 3                  | 0.057        | 0.019   | 0.019                     | 0.094                     |
|                                                | Short day   | S42-IL017 | <b>segment 1</b>           | <b>0.207</b> | 0.015   | <b>0.176</b>              | <b>0.237</b>              |
|                                                |             |           | <b>segment 2</b>           | <b>0.440</b> | 0.012   | <b>0.416</b>              | <b>0.463</b>              |
|                                                |             |           | segment 3                  | 0.026        | 0.006   | 0.014                     | 0.038                     |
| Induction of floret primordia<br>(see Fig. 1D) | Long day    | Scarlett  | segment 1                  | -0.005       | 0.332   | -0.660                    | 0.651                     |
|                                                |             |           | <b>segment 2</b>           | <b>2.107</b> | 0.040   | <b>2.027</b>              | <b>2.187</b>              |
|                                                |             |           | segment 3                  | 0.098        | 0.069   | -0.038                    | 0.235                     |
|                                                | Short day   | S42-IL017 | segment 1                  | -0.109       | 0.491   | -1.081                    | 0.863                     |
|                                                |             |           | <b>segment 2</b>           | <b>2.683</b> | 0.087   | <b>2.510</b>              | <b>2.856</b>              |
|                                                |             |           | segment 3                  | -0.080       | 0.039   | -0.158                    | -0.002                    |
| Induction of floret primordia<br>(see Fig. 1D) | Long day    | Scarlett  | segment 1                  | 0.095        | 0.095   | -0.093                    | 0.283                     |
|                                                |             |           | <b>segment 2</b>           | <b>1.247</b> | 0.045   | <b>1.158</b>              | <b>1.336</b>              |
|                                                |             |           | segment 3                  | 0.557        | 0.035   | 0.487                     | 0.628                     |
|                                                | Short day   | S42-IL017 | segment 1                  | 0.135        | 0.098   | -0.059                    | 0.330                     |
|                                                |             |           | <b>segment 2</b>           | <b>1.206</b> | 0.041   | <b>1.125</b>              | <b>1.286</b>              |
|                                                |             |           | segment 3                  | 0.509        | 0.041   | 0.427                     | 0.591                     |

<sup>1</sup>Upper and lower 95%-Confidence Interval of the slope

Broken-line regressions performed with the 'segmented'-package in R (Muggeo et al. 2003 and 2008).

**Supplemental Table 2: Average differences\* in expression levels (RPKM) between transcripts in coexpression clusters I-III**

| <b>Tissue</b> | <b>Wad. Stage</b> | <b>Cluster I</b> | <b>Cluster II</b> | <b>Cluster III</b> |
|---------------|-------------------|------------------|-------------------|--------------------|
| Leaf          | 1.0 - 2.0         | 1.34             | 0.03              | -1.07              |
| Apex          | 3.5               | -1.48            | 0.18              | 0.19               |
| Apex          | 0.5 - 2.0         | -3.10            | -0.24             | 0.47               |

\*Average over RPKM log<sub>2</sub>-fold changes per transcript between leaf samples at stage W1.0-2.0, apex samples at W3.5 and apex samples at W0.5-W2.0, respectively.

**Supplemental Table 3: GO-term enrichment for 3299 transcripts specifically upregulated at stamen primordium stage**

| GO-ID      | GO-Term <sup>1</sup>                                                               | FDR      | GO-ID      | GO-Term <sup>1</sup>                                          | FDR      |
|------------|------------------------------------------------------------------------------------|----------|------------|---------------------------------------------------------------|----------|
| GO:0015979 | photosynthesis                                                                     | 1.95E-88 | GO:0044724 | single-organism carbohydrate catabolic process                | 1.76E-08 |
| GO:0019684 | photosynthesis, light reaction                                                     | 1.79E-69 | GO:0044723 | single-organism carbohydrate metabolic process                | 2.66E-08 |
| GO:0006091 | generation of precursor metabolites and energy                                     | 1.94E-35 | GO:0010218 | response to far red light                                     | 2.66E-08 |
| GO:0009765 | photosynthesis, light harvesting                                                   | 3.62E-32 | GO:0035304 | regulation of protein dephosphorylation                       | 5.34E-08 |
| GO:0055114 | oxidation-reduction process                                                        | 1.67E-26 | GO:0008152 | metabolic process                                             | 5.34E-08 |
| GO:0009767 | photosynthetic electron transport chain                                            | 2.92E-23 | GO:0005996 | monosaccharide metabolic process                              | 5.77E-08 |
| GO:0006740 | NADPH regeneration                                                                 | 7.61E-20 | GO:0006721 | terpenoid metabolic process                                   | 6.00E-08 |
| GO:0006098 | pentose-phosphate shunt                                                            | 2.55E-19 | GO:0008654 | phospholipid biosynthetic process                             | 1.02E-07 |
| GO:0006739 | NADP metabolic process                                                             | 1.24E-18 | GO:0006007 | glucose catabolic process                                     | 1.05E-07 |
| GO:0019362 | pyridine nucleotide metabolic process                                              | 2.37E-18 | GO:0046365 | monosaccharide catabolic process                              | 1.05E-07 |
| GO:0046496 | nicotinamide nucleotide metabolic process                                          | 3.43E-18 | GO:0019320 | hexose catabolic process                                      | 1.05E-07 |
| GO:0042440 | pigment metabolic process                                                          | 4.84E-18 | GO:0019685 | photosynthesis, dark reaction                                 | 1.62E-07 |
| GO:0072524 | pyridine-containing compound metabolic process                                     | 8.76E-17 | GO:0010155 | regulation of proton transport                                | 1.69E-07 |
| GO:0006733 | oxidoreduction coenzyme metabolic process                                          | 4.20E-16 | GO:0035303 | regulation of dephosphorylation                               | 4.78E-07 |
| GO:0051186 | cofactor metabolic process                                                         | 9.48E-16 | GO:0016114 | terpenoid biosynthetic process                                | 5.09E-07 |
| GO:0019288 | isopentenyl diphosphate biosynthetic process, methylerythritol 4-phosphate pathway | 1.51E-15 | GO:0005984 | disaccharide metabolic process                                | 8.95E-07 |
| GO:0009240 | isopentenyl diphosphate biosynthetic process                                       | 2.10E-15 | GO:0019318 | hexose metabolic process                                      | 1.34E-06 |
| GO:0046490 | isopentenyl diphosphate metabolic process                                          | 2.10E-15 | GO:0016143 | S-glycoside metabolic process                                 | 1.48E-06 |
| GO:0019682 | glyceraldehyde-3-phosphate metabolic process                                       | 2.10E-15 | GO:0019760 | glucosinolate metabolic process                               | 1.48E-06 |
| GO:0015994 | chlorophyll metabolic process                                                      | 2.54E-15 | GO:0019757 | glucosinolate metabolic process                               | 1.48E-06 |
| GO:0016116 | carotenoid metabolic process                                                       | 4.87E-15 | GO:0009311 | oligosaccharide metabolic process                             | 1.51E-06 |
| GO:0016108 | tetraterpenoid metabolic process                                                   | 4.87E-15 | GO:0019253 | reductive pentose-phosphate cycle                             | 1.78E-06 |
| GO:0018298 | protein-chromophore linkage                                                        | 5.75E-15 | GO:0006118 | electron transport                                            | 2.23E-06 |
| GO:0046148 | pigment biosynthetic process                                                       | 6.57E-15 | GO:0005982 | starch metabolic process                                      | 3.13E-06 |
| GO:0008299 | isoprenoid biosynthetic process                                                    | 1.61E-14 | GO:0051667 | establishment of plastid localization                         | 7.53E-06 |
| GO:0016117 | carotenoid biosynthetic process                                                    | 2.38E-14 | GO:0009902 | chloroplast relocation                                        | 7.53E-06 |
| GO:0016109 | tetraterpenoid biosynthetic process                                                | 2.38E-14 | GO:0051644 | plastid localization                                          | 1.00E-05 |
| GO:0006778 | porphyrin-containing compound metabolic process                                    | 5.30E-14 | GO:0006006 | glucose metabolic process                                     | 1.11E-05 |
| GO:0033013 | tetrapyrrole metabolic process                                                     | 5.30E-14 | GO:0006073 | cellular glucan metabolic process                             | 1.48E-05 |
| GO:0022900 | electron transport chain                                                           | 7.40E-14 | GO:0044042 | glucan metabolic process                                      | 1.48E-05 |
| GO:0006720 | isoprenoid metabolic process                                                       | 9.64E-14 | GO:0044262 | cellular carbohydrate metabolic process                       | 1.61E-05 |
| GO:0006090 | pyruvate metabolic process                                                         | 3.56E-13 | GO:0009250 | glucan biosynthetic process                                   | 1.74E-05 |
| GO:0010207 | photosystem II assembly                                                            | 1.07E-12 | GO:0032787 | monocarboxylic acid metabolic process                         | 1.88E-05 |
| GO:0006081 | cellular aldehyde metabolic process                                                | 2.53E-12 | GO:0044802 | single-organism membrane organization                         | 4.26E-05 |
| GO:0000023 | maltose metabolic process                                                          | 2.07E-11 | GO:0008610 | lipid biosynthetic process                                    | 4.43E-05 |
| GO:0015995 | chlorophyll biosynthetic process                                                   | 5.89E-11 | GO:0006766 | vitamin metabolic process                                     | 5.58E-05 |
| GO:0019252 | starch biosynthetic process                                                        | 1.09E-10 | GO:0051188 | cofactor biosynthetic process                                 | 6.98E-05 |
| GO:0044710 | single-organism metabolic process                                                  | 1.42E-10 | GO:0009617 | response to bacterium                                         | 8.06E-05 |
| GO:0005975 | carbohydrate metabolic process                                                     | 2.45E-10 | GO:0016144 | S-glycoside biosynthetic process                              | 8.52E-05 |
| GO:0009657 | plastid organization                                                               | 3.63E-10 | GO:0019761 | glucosinolate biosynthetic process                            | 8.52E-05 |
| GO:0006732 | coenzyme metabolic process                                                         | 3.81E-10 | GO:0019758 | glucosinolate biosynthetic process                            | 8.52E-05 |
| GO:0010114 | response to red light                                                              | 1.01E-09 | GO:0006629 | lipid metabolic process                                       | 1.03E-04 |
| GO:0033014 | tetrapyrrole biosynthetic process                                                  | 1.15E-09 | GO:0006805 | xenobiotic metabolic process                                  | 1.44E-04 |
| GO:0010027 | thylakoid membrane organization                                                    | 1.57E-09 | GO:0071466 | cellular response to xenobiotic stimulus                      | 1.44E-04 |
| GO:0009668 | plastid membrane organization                                                      | 1.57E-09 | GO:0010109 | regulation of photosynthesis                                  | 1.44E-04 |
| GO:0006779 | porphyrin-containing compound biosynthetic process                                 | 1.69E-09 | GO:0051656 | establishment of organelle localization                       | 1.52E-04 |
| GO:0009773 | photosynthetic electron transport in photosystem I                                 | 2.78E-09 | GO:0010304 | PSII associated light-harvesting complex II catabolic process | 1.70E-04 |
| GO:0016556 | mRNA modification                                                                  | 6.14E-09 | GO:0006636 | unsaturated fatty acid biosynthetic process                   | 1.71E-04 |
| GO:0009637 | response to blue light                                                             | 6.14E-09 | GO:0042742 | defense response to bacterium                                 | 1.93E-04 |
| GO:0016052 | carbohydrate catabolic process                                                     | 1.47E-08 |            |                                                               |          |

(table continued on next page)

<sup>1</sup> Only GO-terms assigned to biological processes are shown



Supplemental Table 3: continued

| GO-ID                                       | GO-Term <sup>1</sup>                               | FDR      | GO-ID      | GO-Term <sup>1</sup>                                         | FDR      |
|---------------------------------------------|----------------------------------------------------|----------|------------|--------------------------------------------------------------|----------|
| <b>(table continued from previous page)</b> |                                                    |          | GO:0043467 | regulation of generation of precursor metabolites and energy | 6.88E-03 |
| GO:0006644                                  | phospholipid metabolic process                     | 2.13E-04 | GO:0009314 | response to radiation                                        | 6.97E-03 |
| GO:0016051                                  | carbohydrate biosynthetic process                  | 2.18E-04 | GO:0019748 | secondary metabolic process                                  | 7.14E-03 |
| GO:0044255                                  | cellular lipid metabolic process                   | 2.21E-04 | GO:0030091 | protein repair                                               | 7.22E-03 |
| GO:0006787                                  | porphyrin-containing compound catabolic process    | 3.62E-04 | GO:0009772 | photosynthetic electron transport in photosystem II          | 7.22E-03 |
| GO:0033015                                  | tetrapyrrole catabolic process                     | 3.62E-04 | GO:0010206 | photosystem II repair                                        | 7.22E-03 |
| GO:0051187                                  | cofactor catabolic process                         | 3.62E-04 | GO:0033692 | cellular polysaccharide biosynthetic process                 | 7.31E-03 |
| GO:0005976                                  | polysaccharide metabolic process                   | 3.62E-04 | GO:0043647 | inositol phosphate metabolic process                         | 7.59E-03 |
| GO:0042197                                  | halogenated hydrocarbon metabolic process          | 3.85E-04 | GO:0006124 | ferredoxin metabolic process                                 | 7.60E-03 |
| GO:0042196                                  | chlorinated hydrocarbon metabolic process          | 3.85E-04 | GO:0016072 | rRNA metabolic process                                       | 7.77E-03 |
| GO:0006790                                  | sulfur compound metabolic process                  | 4.26E-04 | GO:0009070 | serine family amino acid biosynthetic process                | 8.11E-03 |
| GO:0009416                                  | response to light stimulus                         | 4.60E-04 | GO:0006749 | glutathione metabolic process                                | 8.28E-03 |
| GO:0006804                                  | peroxidase reaction                                | 4.80E-04 | GO:0071496 | cellular response to external stimulus                       | 9.08E-03 |
| GO:0009607                                  | response to biotic stimulus                        | 6.25E-04 | GO:0031668 | cellular response to extracellular stimulus                  | 9.08E-03 |
| GO:0061024                                  | membrane organization                              | 6.34E-04 | GO:0010374 | stomatal complex development                                 | 9.44E-03 |
| GO:0019497                                  | hexachlorocyclohexane metabolic process            | 6.35E-04 | GO:0009744 | response to sucrose stimulus                                 | 9.74E-03 |
| GO:0015996                                  | chlorophyll catabolic process                      | 7.37E-04 | GO:0034285 | response to disaccharide stimulus                            | 9.74E-03 |
| GO:0046149                                  | pigment catabolic process                          | 7.37E-04 | GO:0070887 | cellular response to chemical stimulus                       | 1.05E-02 |
| GO:0000271                                  | polysaccharide biosynthetic process                | 7.98E-04 | GO:0071214 | cellular response to abiotic stimulus                        | 1.05E-02 |
| GO:0044264                                  | cellular polysaccharide metabolic process          | 7.98E-04 | GO:1901659 | glycosyl compound biosynthetic process                       | 1.38E-02 |
| GO:0080167                                  | response to karrikin                               | 8.85E-04 | GO:0006534 | cysteine metabolic process                                   | 1.47E-02 |
| GO:0033559                                  | unsaturated fatty acid metabolic process           | 9.63E-04 | GO:0044272 | sulfur compound biosynthetic process                         | 1.52E-02 |
| GO:0009410                                  | response to xenobiotic stimulus                    | 1.02E-03 | GO:0050896 | response to stimulus                                         | 1.64E-02 |
| GO:0019637                                  | organophosphate metabolic process                  | 1.06E-03 | GO:0051640 | organelle localization                                       | 1.72E-02 |
| GO:0051707                                  | response to other organism                         | 1.06E-03 | GO:0006518 | peptide metabolic process                                    | 1.99E-02 |
| GO:0009414                                  | response to water deprivation                      | 1.08E-03 | GO:0006818 | hydrogen transport                                           | 2.02E-02 |
| GO:0006803                                  | glutathione conjugation reaction                   | 1.60E-03 | GO:0015992 | proton transport                                             | 2.02E-02 |
| GO:1901700                                  | response to oxygen-containing compound             | 1.70E-03 | GO:0009695 | jasmonic acid biosynthetic process                           | 2.08E-02 |
| GO:0009658                                  | chloroplast organization                           | 1.78E-03 | GO:0006952 | defense response                                             | 2.16E-02 |
| GO:0006979                                  | response to oxidative stress                       | 2.27E-03 | GO:0046173 | polyol biosynthetic process                                  | 2.37E-02 |
| GO:0033517                                  | myo-inositol hexakisphosphate metabolic process    | 2.41E-03 | GO:0055080 | cation homeostasis                                           | 2.42E-02 |
| GO:0010264                                  | myo-inositol hexakisphosphate biosynthetic process | 2.41E-03 | GO:0042631 | cellular response to water deprivation                       | 2.42E-02 |
| GO:0006767                                  | water-soluble vitamin metabolic process            | 2.42E-03 | GO:0071462 | cellular response to water stimulus                          | 2.42E-02 |
| GO:0006771                                  | riboflavin metabolic process                       | 2.42E-03 | GO:0043269 | regulation of ion transport                                  | 2.60E-02 |
| GO:0042726                                  | flavin-containing compound metabolic process       | 2.42E-03 | GO:0042221 | response to chemical stimulus                                | 2.60E-02 |
| GO:0034637                                  | cellular carbohydrate biosynthetic process         | 2.56E-03 | GO:0043155 | negative regulation of photosynthesis, light reaction        | 2.68E-02 |
| GO:0009639                                  | response to red or far red light                   | 2.88E-03 | GO:0010205 | photoinhibition                                              | 2.68E-02 |
| GO:0009415                                  | response to water stimulus                         | 3.06E-03 | GO:0042724 | thiamine-containing compound biosynthetic process            | 3.17E-02 |
| GO:0032958                                  | inositol phosphate biosynthetic process            | 3.47E-03 | GO:1990066 | energy quenching                                             | 3.17E-02 |
| GO:0009694                                  | jasmonic acid metabolic process                    | 3.56E-03 | GO:0009228 | thiamine biosynthetic process                                | 3.17E-02 |
| GO:0090407                                  | organophosphate biosynthetic process               | 3.82E-03 | GO:0010196 | nonphotochemical quenching                                   | 3.17E-02 |
| GO:0019725                                  | cellular homeostasis                               | 4.35E-03 | GO:0006546 | glycine catabolic process                                    | 3.20E-02 |
| GO:0015977                                  | carbon fixation                                    | 4.62E-03 | GO:0009071 | serine family amino acid catabolic process                   | 3.20E-02 |
| GO:0046487                                  | glyoxylate metabolic process                       | 4.62E-03 | GO:0009743 | response to carbohydrate stimulus                            | 3.69E-02 |
| GO:0044550                                  | secondary metabolite biosynthetic process          | 4.67E-03 | GO:0009814 | defense response, incompatible interaction                   | 4.32E-02 |
| GO:0009628                                  | response to abiotic stimulus                       | 4.78E-03 | GO:0006812 | cation transport                                             | 4.43E-02 |
| GO:0010103                                  | stomatal complex morphogenesis                     | 5.33E-03 | GO:0030003 | cellular cation homeostasis                                  | 4.51E-02 |
| GO:0006364                                  | rRNA processing                                    | 5.77E-03 | GO:0006013 | mannose metabolic process                                    | 4.52E-02 |
| GO:0006950                                  | response to stress                                 | 6.23E-03 | GO:0006753 | nucleoside phosphate metabolic process                       | 4.60E-02 |
| GO:0009991                                  | response to extracellular stimulus                 | 6.28E-03 | GO:0009117 | nucleotide metabolic process                                 | 4.74E-02 |
| GO:0019344                                  | cysteine biosynthetic process                      | 6.31E-03 | GO:0010258 | NADH dehydrogenase complex (plastoquinone) assembly          | 4.74E-02 |
| GO:0042548                                  | regulation of photosynthesis, light reaction       | 6.88E-03 |            |                                                              |          |

<sup>1</sup>Only GO-terms assigned to biological processes are shown

**Supplemental Table 4: GO-term enrichment for 798 transcripts upregulated during floral transition**

| GO-ID      | GO-Term <sup>1</sup>                           | FDR      |
|------------|------------------------------------------------|----------|
| GO:0045449 | regulation of transcription, DNA-dependent     | 1.34E-03 |
| GO:0044262 | cellular carbohydrate metabolic process        | 5.25E-03 |
| GO:0005985 | sucrose metabolic process                      | 5.25E-03 |
| GO:0009725 | response to hormone stimulus                   | 8.60E-03 |
| GO:0032870 | cellular response to hormone stimulus          | 9.46E-03 |
| GO:0071495 | cellular response to endogenous stimulus       | 9.46E-03 |
| GO:0006073 | cellular glucan metabolic process              | 9.46E-03 |
| GO:0044042 | glucan metabolic process                       | 9.46E-03 |
| GO:0009719 | response to endogenous stimulus                | 9.46E-03 |
| GO:0005976 | polysaccharide metabolic process               | 1.10E-02 |
| GO:0044264 | cellular polysaccharide metabolic process      | 1.10E-02 |
| GO:0005975 | carbohydrate metabolic process                 | 1.14E-02 |
| GO:0033993 | response to lipid                              | 1.14E-02 |
| GO:0009556 | microsporogenesis                              | 1.33E-02 |
| GO:0048236 | plant-type spore development                   | 1.33E-02 |
| GO:0005982 | starch metabolic process                       | 1.33E-02 |
| GO:0005984 | disaccharide metabolic process                 | 2.38E-02 |
| GO:0071396 | cellular response to lipid                     | 2.72E-02 |
| GO:0071310 | cellular response to organic substance         | 2.98E-02 |
| GO:0006075 | (1->3)-beta-D-glucan biosynthetic process      | 2.98E-02 |
| GO:0006074 | (1->3)-beta-D-glucan metabolic process         | 2.98E-02 |
| GO:0009624 | response to nematode                           | 3.34E-02 |
| GO:0009311 | oligosaccharide metabolic process              | 3.35E-02 |
| GO:0010233 | phloem transport                               | 3.68E-02 |
| GO:0010232 | vascular transport                             | 3.68E-02 |
| GO:0010033 | response to organic substance                  | 3.81E-02 |
| GO:0006355 | regulation of transcription, DNA-dependent     | 4.65E-02 |
| GO:0044723 | single-organism carbohydrate metabolic process | 4.90E-02 |

<sup>1</sup>Only GO-terms assigned to biological processes are shown

**Supplemental Table 5: GO-term enrichment for 1434 DETs commonly expressed during floral transition and at stamen primordium stage**

| GO-ID      | GO-Term <sup>1</sup>                           | FDR      | GO-ID      | GO-Term <sup>1</sup>                                           | FDR      |
|------------|------------------------------------------------|----------|------------|----------------------------------------------------------------|----------|
| GO:0045449 | regulation of transcription, DNA-dependent     | 2.56E-08 | GO:0009624 | response to nematode                                           | 9.93E-03 |
| GO:0071824 | protein-DNA complex subunit organization       | 1.51E-05 | GO:0042221 | response to chemical stimulus                                  | 1.03E-02 |
| GO:0065004 | protein-DNA complex assembly                   | 1.51E-05 | GO:0005976 | polysaccharide metabolic process                               | 1.17E-02 |
| GO:0031497 | chromatin assembly                             | 1.51E-05 | GO:0005982 | starch metabolic process                                       | 1.36E-02 |
| GO:0006334 | nucleosome assembly                            | 1.54E-05 | GO:0044264 | cellular polysaccharide metabolic process                      | 1.50E-02 |
| GO:0034728 | nucleosome organization                        | 1.54E-05 | GO:0009059 | macromolecule biosynthetic process                             | 1.66E-02 |
| GO:0006323 | DNA packaging                                  | 5.63E-05 | GO:0034645 | cellular macromolecule biosynthetic process                    | 1.78E-02 |
| GO:0006333 | chromatin assembly or disassembly              | 1.59E-04 | GO:0071704 | organic substance metabolic process                            | 1.99E-02 |
| GO:0071103 | DNA conformation change                        | 8.83E-04 | GO:0009058 | biosynthetic process                                           | 2.00E-02 |
| GO:0005985 | sucrose metabolic process                      | 1.27E-03 | GO:0010582 | floral meristem determinacy                                    | 2.01E-02 |
| GO:0009725 | response to hormone stimulus                   | 1.29E-03 | GO:0005984 | disaccharide metabolic process                                 | 2.03E-02 |
| GO:0009719 | response to endogenous stimulus                | 1.29E-03 | GO:0044249 | cellular biosynthetic process                                  | 2.46E-02 |
| GO:2001141 | regulation of RNA biosynthetic process         | 3.22E-03 | GO:0048509 | regulation of meristem development                             | 2.62E-02 |
| GO:0043086 | negative regulation of catalytic activity      | 3.88E-03 | GO:0033993 | response to lipid                                              | 3.19E-02 |
| GO:0006073 | cellular glucan metabolic process              | 3.95E-03 | GO:0010073 | meristem maintenance                                           | 3.19E-02 |
| GO:0044042 | glucan metabolic process                       | 3.95E-03 | GO:0010556 | regulation of macromolecule biosynthetic process               | 3.19E-02 |
| GO:0010022 | meristem determinacy                           | 3.95E-03 | GO:2000112 | regulation of cellular macromolecule biosynthetic process      | 3.19E-02 |
| GO:0010077 | maintenance of inflorescence meristem identity | 6.69E-03 | GO:0019219 | regulation of nucleobase-containing compound metabolic process | 3.52E-02 |
| GO:0044262 | cellular carbohydrate metabolic process        | 6.69E-03 | GO:0032870 | cellular response to hormone stimulus                          | 3.68E-02 |
| GO:0006355 | regulation of transcription, DNA-dependent     | 6.69E-03 | GO:0071495 | cellular response to endogenous stimulus                       | 3.68E-02 |
| GO:0008152 | metabolic process                              | 8.82E-03 | GO:0010033 | response to organic substance                                  | 3.82E-02 |
| GO:0042254 | ribosome biogenesis                            | 8.82E-03 | GO:0009311 | oligosaccharide metabolic process                              | 3.82E-02 |
| GO:1901576 | organic substance biosynthetic process         | 8.82E-03 | GO:1901700 | response to oxygen-containing compound                         | 3.82E-02 |
| GO:0044092 | negative regulation of molecular function      | 8.82E-03 | GO:0031326 | regulation of cellular biosynthetic process                    | 3.82E-02 |
| GO:0010076 | maintenance of floral meristem identity        | 8.85E-03 | GO:0051171 | regulation of nitrogen compound metabolic process              | 3.82E-02 |
| GO:0051252 | regulation of RNA metabolic process            | 9.21E-03 | GO:0034654 | nucleobase-containing compound biosynthetic process            | 3.82E-02 |
| GO:0032774 | RNA biosynthetic process                       | 9.76E-03 | GO:0005975 | carbohydrate metabolic process                                 | 4.12E-02 |
| GO:0006351 | transcription, DNA-dependent                   | 9.76E-03 | GO:0009889 | regulation of biosynthetic process                             | 4.20E-02 |
| GO:0022613 | ribonucleoprotein complex biogenesis           | 9.93E-03 | GO:0071836 | nectar secretion                                               | 4.20E-02 |
| GO:0006412 | translation                                    | 9.93E-03 | GO:0042545 | cell wall modification                                         | 4.74E-02 |

<sup>1</sup> Only GO-terms assigned to biological processes are shown

**SupplementalTable 6: Selected\* transcripts downregulated during MSA development independent of the photoperiod and genotype**

| Transcript                                              | Reference Set <sup>1</sup> | Coexpression Cluster | logFC <sup>2</sup> | Barley Gene Identifier | Arabidopsis Gene Model <sup>3</sup> | Arabidopsis Gene Identifier | Description <sup>4</sup>                    |
|---------------------------------------------------------|----------------------------|----------------------|--------------------|------------------------|-------------------------------------|-----------------------------|---------------------------------------------|
| <b>Flowering, floral organ and meristem development</b> |                            |                      |                    |                        |                                     |                             |                                             |
| Hv.110                                                  | Hv                         | 21                   | -4.33              | <i>BM1</i>             | AT2G22540.1                         | <i>SVP</i>                  | Short vegetative phase                      |
| Hv.19680                                                | Hv                         | 21                   | -1.79              | <i>BM10</i>            |                                     |                             |                                             |
| Hv.15491                                                | Hv                         | 21                   | -2.61              | <i>VRT2</i>            |                                     |                             |                                             |
| Hv.8782                                                 | Hv                         | 21                   | -1.60              |                        | AT2G30140.1                         | <i>UGT87A2</i>              | UDP-Glucosyl transferase 87A2               |
| MLOC_14596.3                                            | sHC                        | 29                   | -1.54              |                        | AT1G68640.1                         | <i>PAN</i>                  | Perianthia                                  |
| contig_10845                                            | DNC-T                      | 29                   | -3.48              |                        | AT3G26120.1                         | <i>TEL1</i>                 | Terminal EAR1-like 1                        |
| MLOC_51836.1                                            | sLC                        | 29                   | -2.24              |                        |                                     |                             |                                             |
| MLOC_56117.1                                            | sHC                        | 29                   | -2.37              |                        | AT1G10120.1                         | <i>CIB4</i>                 | CRY2-interacting bHLH 4                     |
| Hv.35135                                                | Hv                         | 30                   | -3.64              | <i>AP2-2L</i>          | AT4G36920.2                         | <i>AP2</i>                  | Apetala 2                                   |
| contig_22204                                            | DNC-T                      | 30                   | -6.11              |                        | AT4G33280.1                         |                             | AP2/B3-like transcriptional factor          |
| Hv.12609                                                | Hv                         | 30                   | -5.96              |                        | AT3G18990.1                         | <i>VRN1</i>                 | Reduced vernalization response 1            |
| contig_3763                                             | DNC-T                      | 30                   | -6.25              |                        | AT3G23290.2                         | <i>LSH4</i>                 | Light sensitive                             |
| MLOC_10221.2                                            | sHC                        | 31                   | -1.03              |                        | AT4G37750.1                         | <i>ANT</i>                  | Aintegumenta                                |
| <b>Hormones and signalling</b>                          |                            |                      |                    |                        |                                     |                             |                                             |
| MLOC_52145.1                                            | sHC                        | 21                   | -5.25              |                        | AT2G41510.1                         | <i>CKX1</i>                 | Cytokinin oxidase/dehydrogenase             |
| Hv.31348                                                | Hv                         | 29                   | -1.61              |                        | AT3G16500.1                         | <i>PAP1</i>                 | Phytochrome-associated protein 1            |
| Hv.33734                                                | Hv                         | 30                   | -4.48              |                        | AT4G35390.1                         | <i>AGF1</i>                 | At-hook protein of GA feedback 1            |
| Hv.11559                                                | Hv                         | 30                   | -3.46              |                        | AT1G02400                           | <i>ATGA2OX6</i>             | Gibberellin-2-oxidase-6                     |
| <b>Others</b>                                           |                            |                      |                    |                        |                                     |                             |                                             |
| Hv.12175                                                | Hv                         | 29                   | -2.83              |                        | AT3G04290.1                         | <i>LTL1</i>                 | Li-tolerant lipase 1                        |
| MLOC_44910.1                                            | sHC                        | 29                   | -1.31              |                        | AT2G39760.1                         | <i>BPM3</i>                 | BTB/POZ/MATH-domains containing protein     |
| MLOC_14316.1                                            | sHC                        | 29                   | -2.22              |                        | AT4G09510.2                         | <i>CINV2</i>                | Cytosolic invertase 2                       |
| contig_4243                                             | DNC-T                      | 30                   | -5.24              |                        | AT1G15910.1                         | <i>FDM1</i>                 | Factor of DNA methylation 1                 |
| MLOC_68447.1                                            | sLC                        | 30                   | -3.16              |                        | AT5G24280.1                         | <i>GMI1</i>                 | Gamma-irradiation and mitomycin c induced 1 |

\*Transcripts represent the expression profiles of 154 DETs downregulated during MSA development independent of the

<sup>1</sup>Set of reference transcripts:

<sup>2</sup>log<sub>2</sub> fold change of transcript abundance in shoot apices of S42-IL107 at W3.5 as compared to W0.5 under short-day conditions.

<sup>3</sup>Arabidopsis gene model (Best BLASTx hit)

<sup>4</sup>Annotation of Arabidopsis gene model (TAIR 10)

**Supplemental Table 7: Coexpression clusters enriched for transcripts downregulated during MSA development independent of the photoperiod and genotype**

| Cluster ID | Cluster Size | Number of<br>DETs in<br>Cluster | Expected Number<br>of DETs | Enrichment <sup>1</sup> |
|------------|--------------|---------------------------------|----------------------------|-------------------------|
| Cluster 30 | 55           | 31                              | 1.11                       | 27.83 ***               |
| Cluster 29 | 319          | 46                              | 6.46                       | 7.12 ***                |
| Cluster 21 | 141          | 12                              | 2.86                       | 4.20 ***                |
| Cluster 31 | 716          | 24                              | 14.50                      | 1.66 *                  |
| Cluster 26 | 521          | 16                              | 10.55                      | 1.52                    |
| Cluster 22 | 260          | 9                               | 5.27                       | 1.71                    |
| Cluster 11 | 217          | 4                               | 4.39                       | 0.91                    |
| Cluster 28 | 333          | 6                               | 6.74                       | 0.89                    |
| Cluster 27 | 218          | 3                               | 4.42                       | 0.68                    |
| Cluster 12 | 345          | 2                               | 6.99                       | 0.29                    |
| Cluster 25 | 302          | 1                               | 6.12                       | 0.16                    |
| <b>SUM</b> |              | <b>154</b>                      |                            |                         |

<sup>1</sup>Chi-squared test: \*p<0.05, \*\*p<0.01, \*\*\*p<0.001

**Supplemental Table 8: Selected\* transcripts upregulated during MSA development independent of the photoperiod and genotype**

| Transcript                                              | Reference Set <sup>1</sup> | Coexpression Cluster | logFC <sup>2</sup> | Barley Gene Identifier | Arabidopsis Gene Model <sup>3</sup> | Arabidopsis Gene Identifier | Description <sup>4</sup>                            |
|---------------------------------------------------------|----------------------------|----------------------|--------------------|------------------------|-------------------------------------|-----------------------------|-----------------------------------------------------|
| <b>Flowering, floral organ and meristem development</b> |                            |                      |                    |                        |                                     |                             |                                                     |
| Hv.12878                                                | Hv                         | 16                   | 3.13               | <i>KN1</i>             | AT4G08150.1                         | <i>BP1</i>                  | Brevipedicellus 1                                   |
| Hv.20746                                                | Hv                         | 16                   | 9.53               | <i>AG1</i>             | AT4G18960.1                         | <i>AG</i>                   | Agamous                                             |
| Hv.11508                                                | Hv                         | 16                   | 2.57               |                        | AT2G41370.1                         | <i>BOP2</i>                 | Blade on Petiole 2                                  |
| Hv.16012                                                | Hv                         | 16                   | 3.36               |                        | AT3G61880.2                         | <i>CYP78A9</i>              | Cytochrome P450 78A9                                |
| MLOC_13032.1                                            | sHC                        | 16                   | 6.02               |                        | AT1G53160.1                         | <i>SPL4</i>                 | Squamosa promoter binding protein-like 4            |
| MLOC_65676.1                                            | sHC                        | 16                   | 3.54               |                        | AT5G59810.1                         | <i>SBT5.4</i>               | Serine-type endopeptidase activity                  |
| Hv.36753                                                | Hv                         | 11                   | 4.79               |                        | AT4G29100.1                         | <i>EPFL6</i>                | EPF1-like 6                                         |
| Hv.11726                                                | Hv                         | 13                   | 2.09               |                        | AT2G27230.2                         | <i>LHW</i>                  | Lonesome highway                                    |
| Hv.8895                                                 | Hv                         | 17                   | 1.44               |                        | AT5G62100.2                         | <i>BAG2</i>                 | BCL2-associated athanogene 2                        |
| Hv.32892                                                | Hv                         | 18                   | 1.55               |                        | AT4G29900.1                         | <i>ACA10</i>                | Autoinhibited Ca(2+)-ATPase 10                      |
| MLOC_70653.1                                            | sHC                        | 24                   | 1.33               |                        | AT4G00180.1                         | <i>YAB3</i>                 | Yabby 3                                             |
| <b>Hormones and signalling</b>                          |                            |                      |                    |                        |                                     |                             |                                                     |
| Hv.2397                                                 | Hv                         | 16                   | 5.51               |                        | AT1G17290.1                         | <i>ALAAT1</i>               | Alanine aminotransferase                            |
| Hv.32781                                                | Hv                         | 16                   | 3.34               |                        | AT4G11530.1                         | <i>CRK34</i>                | Cysteine-rich RLK (receptor-like protein kinase) 34 |
| Hv.15702                                                | Hv                         | 11                   | 3.33               |                        | AT4G30960.1                         | <i>CIPK6</i>                | CBL-interacting protein kinase 6                    |
| Hv.31377                                                | Hv                         | 14                   | 5.60               |                        | AT1G48480.1                         | <i>RKL1</i>                 | Receptor-like kinase 1                              |
| Hv.32577                                                | Hv                         | 17                   | 1.86               |                        | AT3G45860.1                         | <i>CRK4</i>                 | Cysteine-rich RLK (receptor-like protein kinase) 4  |
| Hv.32275                                                | Hv                         | 18                   | 4.75               |                        | AT1G05010.1                         | <i>EFE</i>                  | Ethylene forming enzyme                             |
| <b>Carbohydrate metabolism</b>                          |                            |                      |                    |                        |                                     |                             |                                                     |
| Hv.8649                                                 | Hv                         | 24                   | 5.56               |                        | AT2G15480.2                         | <i>UGT73B5</i>              | UDP-glucosyl transferase 73B5                       |
| Hv.10624                                                | Hv                         | 16                   | 7.35               |                        | AT5G13170.1                         | <i>SWEET15</i>              | Senescence-associated gene 29                       |
| <b>Others</b>                                           |                            |                      |                    |                        |                                     |                             |                                                     |
| MLOC_36809.2                                            | sHC                        | 18                   | 2.31               |                        | AT1G06490.1                         | <i>CALS7</i>                | Callose synthase 7                                  |
| MLOC_50471.2                                            | sLC                        | 18                   | 3.40               |                        | AT3G59100.1                         | <i>GSL11</i>                | Glucan synthase-like 11                             |
| Hv.16527                                                | Hv                         | 16                   | 2.57               |                        | AT1G12110.1                         | <i>NRT1.1</i>               | Nitrate Transporter 1.1                             |
| Hv.10047                                                | Hv                         | 3                    | 1.79               |                        | AT2G42005                           |                             | Transmembrane amino acid transporter family protein |

\*Transcripts represent the expression profiles of 245 DETs upregulated during MSA development independent of the photoperiod and genotype

<sup>1</sup>Set of reference transcripts: Hv: NCBI Barley UniGenes; sHC: selected Barley High Confidence Genes; sLC: selected Barley Low Confidence Genes; DNC-T: selected *de novo* contigs

<sup>2</sup>log<sub>2</sub> fold change of transcript abundance in shoot apices of S42-IL107 at W3.5 as compared to W0.5 under short-day conditions.

<sup>3</sup>Arabidopsis gene model (Best BLASTx hit)

<sup>4</sup>Annotation of Arabidopsis gene model (TAIR 10)

**Supplemental Table 9: Coexpression clusters enriched for transcripts upregulated during MSA development independent of the photoperiod and genotype**

| Cluster ID | Cluster Size | Number of<br>DETs in<br>Cluster | Expected Number<br>of DETs | Enrichment <sup>1</sup> |
|------------|--------------|---------------------------------|----------------------------|-------------------------|
| Cluster 24 | 139          | 23                              | 4.48                       | 5.14 ***                |
| Cluster 16 | 210          | 21                              | 6.77                       | 3.10 ***                |
| Cluster 17 | 568          | 34                              | 18.30                      | 1.86 ***                |
| Cluster 11 | 217          | 17                              | 6.99                       | 2.43 **                 |
| Cluster 13 | 134          | 12                              | 4.32                       | 2.78 **                 |
| Cluster 14 | 105          | 10                              | 3.38                       | 2.96 **                 |
| Cluster 18 | 311          | 18                              | 10.02                      | 1.80 *                  |
| Cluster 19 | 454          | 22                              | 14.63                      | 1.50                    |
| Cluster 12 | 345          | 17                              | 11.12                      | 1.53                    |
| Cluster 15 | 361          | 17                              | 11.63                      | 1.46                    |
| Cluster 4  | 79           | 4                               | 2.55                       | 1.57                    |
| Cluster 20 | 38           | 2                               | 1.22                       | 1.63                    |
| Cluster 6  | 157          | 6                               | 5.06                       | 1.19                    |
| Cluster 23 | 414          | 14                              | 13.34                      | 1.05                    |
| Cluster 10 | 247          | 7                               | 7.96                       | 0.88                    |
| Cluster 2  | 40           | 1                               | 1.29                       | 0.78                    |
| Cluster 3  | 296          | 7                               | 9.54                       | 0.73                    |
| Cluster 1  | 180          | 4                               | 5.80                       | 0.69                    |
| Cluster 25 | 302          | 5                               | 9.73                       | 0.51                    |
| Cluster 8  | 125          | 2                               | 4.03                       | 0.50                    |
| Cluster 7  | 214          | 2                               | 6.90                       | 0.29                    |
|            | <b>SUM</b>   | <b>245</b>                      |                            |                         |

<sup>1</sup>Chi-squared test: \*p<0.05, \*\*p<0.01, \*\*\*p<0.001

**Supplemental Table 10: Coexpression clusters enriched for transcripts upregulated in leaves by long photoperiods and in S42-IL107**

| Cluster ID | Cluster Size | Number of<br>DETs in<br>Cluster | Expected Number<br>of DETs | Enrichment <sup>1</sup> |
|------------|--------------|---------------------------------|----------------------------|-------------------------|
| Cluster 9  | 95           | 59                              | 2.41                       | 24.47 ***               |
| Cluster 11 | 217          | 53                              | 5.51                       | 9.62 ***                |
| Cluster 21 | 141          | 20                              | 3.58                       | 5.59 ***                |
| Cluster 12 | 345          | 41                              | 8.76                       | 4.68 ***                |
| Cluster 8  | 125          | 7                               | 3.17                       | 2.21 *                  |
| Cluster 5  | 10           | 1                               | 0.25                       | 3.94                    |
| Cluster 22 | 260          | 7                               | 6.60                       | 1.06                    |
| Cluster 3  | 296          | 2                               | 7.51                       | 0.27                    |
| Cluster 7  | 214          | 1                               | 5.43                       | 0.18                    |
| Cluster 10 | 247          | 1                               | 6.27                       | 0.16                    |
| Cluster 19 | 454          | 1                               | 11.52                      | 0.09                    |
|            | <b>SUM</b>   | <b>193</b>                      |                            |                         |

<sup>1</sup>Chi-squared test: \*p<0.05, \*\*p<0.01, \*\*\*p<0.001



**Supplemental Table 11: Selected\* transcripts upregulated in leaves by long photoperiods and in S42-IL107**

| Transcript                       | Reference Set <sup>1</sup> | Coexpression Cluster | logFC <sup>2</sup> | logFC <sup>3</sup> | Barley Gene Identifier | Arabidopsis Gene Model <sup>4</sup> | Arabidopsis Gene Identifier | Description <sup>5</sup>                                     |
|----------------------------------|----------------------------|----------------------|--------------------|--------------------|------------------------|-------------------------------------|-----------------------------|--------------------------------------------------------------|
| <b>Flowering, light response</b> |                            |                      |                    |                    |                        |                                     |                             |                                                              |
| Hv.34809                         | Hv                         | 9                    | 3.15               | 3.99               | <i>FT1</i>             | AT1G65480.1                         | <i>FT</i>                   | Flow ering locus T                                           |
| MLOC_6921.1                      | sHC                        | 9                    | 1.24               | 4.68               | <i>CO1</i>             | AT5G15850.1                         | <i>COL1</i>                 | CONSTANS-like 1                                              |
| Hv.29120                         | Hv                         | 9                    | 0.45               | 3.29               |                        | AT4G38180.1                         | <i>FRS5</i>                 | FAR1-related sequence 5                                      |
| Hv.37168                         | Hv                         | 9                    | 1.27               | 1.01               |                        | AT3G04030.3                         | <i>MYR2</i>                 | Homeodomain-like superfamily protein                         |
| MLOC_75496.6                     | sHC                        | 11                   | 1.38               | 1.93               | <i>CO2</i>             | AT3G02380.1                         | <i>COL2</i>                 | CONSTANS-like 2                                              |
| Hv.18604                         | Hv                         | 11                   | 0.46               | 3.19               |                        | AT5G48250.1                         | <i>BBX8</i>                 | B-box type zinc finger protein with CCT domain               |
| MLOC_51314.1                     | sHC                        | 11                   |                    |                    |                        | AT3G07500.1                         |                             | Far-red impaired responsive (FAR1) family protein            |
| contig_38668                     | DNC-T                      | 11                   | 0.67               | 0.50               |                        |                                     |                             |                                                              |
|                                  |                            |                      | 0.63               | 1.02               |                        | AT1G53090.2                         | <i>SPA4</i>                 | SPA1-related 4                                               |
| <b>Disease resistance</b>        |                            |                      |                    |                    |                        |                                     |                             |                                                              |
| Hv.10174                         | Hv                         | 9                    | 0.69               | 0.83               |                        |                                     |                             |                                                              |
| MLOC_66826.2                     | sLC                        | 9                    | 0.48               | 1.77               |                        | AT5G20480.1                         | <i>EFR</i>                  | EF-TU receptor                                               |
| Hv.10217                         | Hv                         | 9                    |                    |                    |                        | AT2G34930.1                         |                             | Disease resistance family protein / LRR family protein       |
| Hv.30969                         | Hv                         | 9                    | 0.50               | 0.76               |                        |                                     |                             |                                                              |
|                                  |                            |                      | 0.68               | 0.76               |                        | AT2G37710.1                         | <i>RLK</i>                  | Receptor lectin kinase                                       |
| MLOC_66610.1                     | sHC                        | 9                    | 0.66               | 0.88               |                        |                                     |                             | LRR and NB-ARC domains containing disease resistance protein |
| contig_388521                    | DNC-T                      | 9                    |                    |                    |                        | AT3G14460.1                         |                             |                                                              |
|                                  |                            |                      | 0.66               | 1.18               |                        |                                     |                             |                                                              |
| MLOC_1192.1                      | sHC                        | 9                    |                    |                    |                        | AT3G07040.1                         | <i>RPM1</i>                 | Resistance to <i>P. syringae</i> pv. <i>maculicola</i> 1     |
|                                  |                            |                      | 0.74               | 1.05               |                        |                                     |                             |                                                              |
| MLOC_14723.1                     | sLC                        | 9                    |                    |                    |                        | AT3G46730.1                         |                             | NB-ARC domain-containing disease resistance protein          |
|                                  |                            |                      | 0.55               | 1.19               |                        |                                     |                             |                                                              |
| contig_385738                    | DNC-T                      | 9                    | 0.74               | 0.92               |                        | AT5G46330.1                         | <i>FLS2</i>                 | Flagellin-sensitive 2                                        |
| contig_385733                    | DNC-T                      | 9                    | 0.60               | 0.87               |                        | AT1G47890.1                         | <i>RLP7</i>                 | Receptor like protein 7                                      |

(table continued on next page)

\*Transcripts represent the expression profiles of 193 DETs upregulated in a *Ppd-H1* dependent manner in leaves<sup>1</sup>Set of reference transcripts: Hv: NCBI Barley UniGenes; sHC: selected Barley High Confidence Genes; sLC: selected Barley Low Confidence Genes; DNC-T: selected *de novo* contigs<sup>2</sup>Arabidopsis gene model (Best BLASTx hit)<sup>3</sup>log<sub>2</sub>-fold change of transcript abundance in leaves of S42-IL107 as compared to Scarlett across the developmental stages W1.0 and W2.0 under long-day conditions<sup>4</sup>log<sub>2</sub>-fold change of transcript abundance comparing leaves of S42-IL107 under long and short photoperiods across the developmental stages W1.0 and W2.0<sup>5</sup>Annotation of Arabidopsis gene model (TAIR 10)

## Supplemental Table 11: continued

| Transcript                                            | Reference Set <sup>1</sup> | Coexpression Cluster | logFC <sup>2</sup> | logFC <sup>3</sup> | Barley Gene Identifier | Arabidopsis Gene Model <sup>4</sup> | Arabidopsis Gene Identifier | Description <sup>5</sup>                   |
|-------------------------------------------------------|----------------------------|----------------------|--------------------|--------------------|------------------------|-------------------------------------|-----------------------------|--------------------------------------------|
| <b>(table continued from previous page)</b>           |                            |                      |                    |                    |                        |                                     |                             |                                            |
| <b>Transport</b>                                      |                            |                      |                    |                    |                        |                                     |                             |                                            |
| Hv.8671                                               | Hv                         | 9                    | 0.46               | 1.97               | YS1                    | AT5G53550.2                         | YSL3                        | YELLOW STRIPE-like 3                       |
| Hv.8787                                               | Hv                         | 12                   | 0.51               | 0.96               |                        | AT3G27020.1                         | YSL6                        | YELLOW STRIPE-like 6                       |
| Hv.23326                                              | Hv                         | 12                   | 0.56               | 1.73               |                        | AT1G65730.1                         | YSL7                        | YELLOW STRIPE-like 7                       |
| Hv.35529                                              | Hv                         | 9                    | 1.92               | 2.26               |                        | AT1G05300.1                         | ZIP5                        | Zinc transporter 5 precursor               |
| Hv.10430                                              | Hv                         | 9                    | 0.21               | 1.06               |                        | AT2G16120.1                         | PMT1                        | Polyol/monosaccharide transporter 1        |
| MLOC_10758.2                                          | sHC                        | 9                    | 1.36               | 2.03               |                        | AT4G13420.1                         | HAK5                        | High affinity K <sup>+</sup> transporter 5 |
| Hv.22725                                              | Hv                         | 11                   | 0.58               | 0.78               |                        | AT1G15520.1                         | PDR12                       | Pleiotropic drug resistance 12             |
| Hv.27044                                              | Hv                         | 11                   | 0.49               | 1.26               |                        | AT1G64890.1                         |                             | Major facilitator superfamily protein      |
| Hv.19083                                              | Hv                         | 11                   | 0.38               | 0.79               |                        | AT2G38410.1                         |                             | ENTH/VHS/GAT family protein                |
| Hv.4917                                               | Hv                         | 12                   | 0.52               | 0.82               |                        | AT1G70300.1                         | KUP6                        | K <sup>+</sup> uptake permease 6           |
| <b>Cell differentiation, floral organ development</b> |                            |                      |                    |                    |                        |                                     |                             |                                            |
| Hv.34198                                              | Hv                         | 9                    | 0.74               | 1.43               |                        | AT1G54510.3                         | NEK1                        | NIMA-related serine/threonine kinase 1     |
| contig_144168                                         | DNC-T                      | 9                    | 0.77               | 0.97               |                        | AT3G11980.1                         | MS2                         | Male sterility 2                           |
| contig_332463                                         | DNC-T                      | 9                    | 1.29               | 1.61               |                        | AT3G02000.1                         | ROXY1                       | Thioredoxin superfamily protein            |
| MLOC_6537.1                                           | sHC                        | 11                   | 0.33               | 1.16               |                        | AT5G49660.1                         | XIP1                        | Xylem intermixed with phloem 1             |
| MLOC_43403.1                                          | sHC                        | 11                   | 0.62               | 2.30               |                        | AT2G03140.2                         |                             | Alpha/beta-Hydrolases superfamily protein  |

\*Transcripts represent the expression profiles of 193 DETs upregulated in a *Ppd-H1* dependent manner in leaves

<sup>1</sup>Set of reference transcripts: Hv: NCBI Barley UniGenes; sHC: selected Barley High Confidence Genes; sLC: selected Barley Low Confidence Genes; DNC-T: selected *de novo* contigs

<sup>2</sup>Arabidopsis gene model (Best BLASTx hit)

<sup>3</sup>log<sub>2</sub>-fold change of transcript abundance in leaves of S42-IL107 as compared to Scarlett across the developmental stages W1.0 and W2.0 under long-day conditions

<sup>4</sup>log<sub>2</sub>-fold change of transcript abundance comparing leaves of S42-IL107 under long and short photoperiods across the developmental stages W1.0 and W2.0

<sup>5</sup>Annotation of Arabidopsis gene model (TAIR 10)

**Supplemental Table 12: GO-term enrichment of transcripts in coexpression clusters 9, 11 and 12**

| <b>GO-ID</b> | <b>GO-Term<sup>1</sup></b>    | <b>FDR</b> |
|--------------|-------------------------------|------------|
| GO:0055085   | transmembrane transport       | 2.06E-05   |
| GO:0046373   | L-arabinose metabolic process | 1.28E-02   |
| GO:0009624   | response to nematode          | 3.66E-02   |

<sup>1</sup>Only GO-terms assigned to biological processes are shown

**Supplemental Table 13: GO-term enrichment for 1205 transcripts downregulated in leaves by long photoperiods and in S42-IL107**

| GO-ID      | GO-Term <sup>1</sup>                        | FDR      | GO-ID                                       | GO-Term <sup>1</sup>                                        | FDR      |
|------------|---------------------------------------------|----------|---------------------------------------------|-------------------------------------------------------------|----------|
| GO:0006334 | nucleosome assembly                         | 3.08E-28 | <b>(table continued from previous page)</b> |                                                             |          |
| GO:0034728 | nucleosome organization                     | 3.08E-28 | GO:0048367                                  | shoot system development                                    | 3.67E-03 |
| GO:0071824 | protein-DNA complex subunit organization    | 1.16E-27 | GO:0005976                                  | polysaccharide metabolic process                            | 4.32E-03 |
| GO:0065004 | protein-DNA complex assembly                | 1.16E-27 | GO:0006073                                  | cellular glucan metabolic process                           | 4.83E-03 |
| GO:0031497 | chromatin assembly                          | 1.16E-27 | GO:0044042                                  | glucan metabolic process                                    | 4.83E-03 |
| GO:0006333 | chromatin assembly or disassembly           | 1.64E-26 | GO:0048731                                  | system development                                          | 5.11E-03 |
| GO:0071103 | DNA conformation change                     | 2.10E-26 | GO:0010073                                  | meristem maintenance                                        | 7.31E-03 |
| GO:0006323 | DNA packaging                               | 2.10E-26 | GO:0048856                                  | anatomical structure development                            | 1.21E-02 |
| GO:0006325 | chromatin organization                      | 1.64E-18 | GO:0005975                                  | carbohydrate metabolic process                              | 1.39E-02 |
| GO:0051276 | chromosome organization                     | 7.59E-14 | GO:0032502                                  | developmental process                                       | 1.57E-02 |
| GO:0034622 | cellular macromolecular complex assembly    | 7.75E-11 | GO:0009734                                  | auxin mediated signaling pathway                            | 1.57E-02 |
| GO:0006259 | DNA metabolic process                       | 2.78E-10 | GO:0043170                                  | macromolecule metabolic process                             | 1.61E-02 |
| GO:0065003 | macromolecular complex assembly             | 6.89E-10 | GO:0043481                                  | anthocyanin accumulation in tissues in response to UV light | 1.61E-02 |
| GO:0043933 | macromolecular complex subunit organization | 1.00E-08 | GO:0043480                                  | pigment accumulation in tissues                             | 1.61E-02 |
| GO:0008283 | cell proliferation                          | 4.40E-08 | GO:0043479                                  | pigment accumulation in tissues in response to UV light     | 1.61E-02 |
| GO:0048466 | androecium development                      | 7.22E-08 | GO:0043478                                  | pigment accumulation in response to UV light                | 1.61E-02 |
| GO:0048443 | stamen development                          | 7.22E-08 | GO:0043476                                  | pigment accumulation                                        | 1.61E-02 |
| GO:0022607 | cellular component assembly                 | 2.35E-07 | GO:0043473                                  | pigmentation                                                | 1.61E-02 |
| GO:0010315 | auxin efflux                                | 1.49E-05 | GO:0044085                                  | cellular component biogenesis                               | 1.68E-02 |
| GO:0006996 | organelle organization                      | 4.43E-05 | GO:0071840                                  | cellular component organization or biogenesis               | 1.68E-02 |
| GO:0048437 | floral organ development                    | 4.68E-05 | GO:0005984                                  | disaccharide metabolic process                              | 1.70E-02 |
| GO:0048513 | organ development                           | 5.20E-05 | GO:0071365                                  | cellular response to auxin stimulus                         | 1.82E-02 |
| GO:0016043 | cellular component organization             | 7.06E-05 | GO:0006139                                  | nucleobase-containing compound metabolic process            | 2.06E-02 |
| GO:0008356 | asymmetric cell division                    | 8.55E-05 | GO:0044262                                  | cellular carbohydrate metabolic process                     | 2.27E-02 |
| GO:0048827 | phyllome development                        | 8.63E-05 | GO:0044260                                  | cellular macromolecule metabolic process                    | 2.64E-02 |
| GO:0048438 | floral whorl development                    | 1.14E-04 | GO:0009311                                  | oligosaccharide metabolic process                           | 2.64E-02 |
| GO:0090304 | nucleic acid metabolic process              | 1.34E-04 | GO:0044264                                  | cellular polysaccharide metabolic process                   | 2.78E-02 |
| GO:0048569 | post-embryonic organ development            | 3.22E-04 | GO:0009926                                  | auxin polar transport                                       | 3.10E-02 |
| GO:0009908 | flower development                          | 5.99E-04 | GO:0051322                                  | anaphase                                                    | 3.41E-02 |
| GO:0010541 | acropetal auxin transport                   | 5.99E-04 | GO:0007275                                  | multicellular organismal development                        | 3.63E-02 |
| GO:0044699 | single-organism process                     | 7.97E-04 | GO:0005982                                  | starch metabolic process                                    | 3.63E-02 |
| GO:0044767 | single-organism developmental process       | 1.00E-03 | GO:0007010                                  | cytoskeleton organization                                   | 3.72E-02 |
| GO:0005985 | sucrose metabolic process                   | 1.15E-03 | GO:2001141                                  | regulation of RNA biosynthetic process                      | 3.75E-02 |
| GO:0060918 | auxin transport                             | 1.75E-03 | GO:0006355                                  | regulation of transcription, DNA-dependent                  | 3.75E-02 |
| GO:0009914 | hormone transport                           | 1.75E-03 | GO:0009733                                  | response to auxin stimulus                                  | 3.88E-02 |
| GO:0051301 | cell division                               | 1.77E-03 | GO:0000911                                  | cytokinesis by cell plate formation                         | 4.43E-02 |
| GO:0010540 | basipetal auxin transport                   | 1.87E-03 | GO:0000279                                  | M phase                                                     | 4.65E-02 |
| GO:0009958 | positive gravitropism                       | 1.87E-03 |                                             |                                                             |          |

<sup>1</sup>Only GO-terms assigned to biological processes are shown

**Supplemental Table 14: Selected\* transcripts upregulated in shoot apices by long photoperiods and in S42-IL107**

| Transcript                                              | Reference Set <sup>1</sup> | Coexpression Cluster | logFC <sup>2</sup> | logFC <sup>3</sup> | Barley Gene Identifier | Arabidopsis Gene Model <sup>4</sup> | Arabidopsis Gene Identifier | Description <sup>5</sup>                                          |
|---------------------------------------------------------|----------------------------|----------------------|--------------------|--------------------|------------------------|-------------------------------------|-----------------------------|-------------------------------------------------------------------|
| <b>Flowering, floral organ and meristem development</b> |                            |                      |                    |                    |                        |                                     |                             |                                                                   |
| Hv.17528                                                | Hv                         | 16                   | 1.72               | 2.70               | <i>FT2</i>             | AT1G65480.1                         | <i>FT</i>                   | Flowering locus T                                                 |
| Hv.169                                                  | Hv                         | 16                   | 0.81               | 0.74               | <i>BM8</i>             | AT1G69120.1                         | <i>AP1</i>                  | Apetala 1                                                         |
| Hv.4298                                                 | Hv                         | 24                   | 0.38               | 0.54               | <i>BM3</i>             |                                     |                             |                                                                   |
| MLOC_44160.1                                            | sHC                        | 29                   | 1.65               | 2.45               | <i>CEN</i>             | AT2G27550.1                         | <i>ATC</i>                  | Centroradialis                                                    |
| Hv.20726                                                | Hv                         | 16                   | 0.62               | 1.50               |                        | AT3G54340.1                         | <i>AP3</i>                  | Apetala 3                                                         |
| MLOC_57803.3                                            | sLC                        | 16                   | 0.19               | 0.34               |                        | AT5G15800.1                         | <i>Sep 01</i>               | Sepallata 1                                                       |
| Hv.29973                                                | Hv                         | 16                   | 0.09               | 0.43               |                        | AT1G24260.1                         | <i>Sep 03</i>               | Sepallata 3                                                       |
| Hv.20696                                                | Hv                         | 16                   | 0.26               | 0.69               |                        | AT5G20240.1                         | <i>PI</i>                   | Pistillata                                                        |
| Hv.15352                                                | Hv                         | 16                   | 0.40               | 1.20               |                        | AT5G65700.2                         | <i>BAM1</i>                 | Barely any meristem 1                                             |
| MLOC_68900.1                                            | sHC                        | 16                   | 0.86               | 1.00               |                        | AT2G26170.1                         | <i>MAX1</i>                 | More axillary branches 1                                          |
| Hv.12185                                                | Hv                         | 16                   | 1.00               | 2.53               |                        | AT1G69780.1                         | <i>HB13</i>                 | Homeobox-leucine zipper protein family                            |
| Hv.18425                                                | Hv                         | 11                   | 1.17               | 1.42               |                        | AT2G46680.1                         | <i>HB7</i>                  | Homeobox domain 7                                                 |
| Hv.15611                                                | Hv                         | 15                   | 1.10               | 1.79               |                        | AT2G38090.1                         |                             | Duplicated homeodomain-like superfamily protein                   |
| <b>Hormone signalling</b>                               |                            |                      |                    |                    |                        |                                     |                             |                                                                   |
| Hv.21105                                                | Hv                         | 10                   | 1.68               | 2.30               | <i>GA20ox1</i>         | AT4G25420.1                         | <i>GA20ox1</i>              | Gibberellin 20-oxidase 1                                          |
| Hv.23094                                                | Hv                         | 21                   | 1.03               | 2.06               |                        | AT3G19000.1                         |                             | 2-oxoglutarate and Fe(II)-dependent oxygenase superfamily protein |
| Hv.5860                                                 | Hv                         | 16                   | 0.65               | 1.15               |                        | AT1G75500.1                         | <i>WAT1</i>                 | Walls are thin 1                                                  |
| Hv.821                                                  | Hv                         | 3                    | 0.01               | 0.32               |                        | AT4G14550.1                         | <i>IAA14</i>                | Indole-3-acetic acid inducible 14                                 |
| Hv.6142                                                 | Hv                         | 18                   | 0.57               | 1.2                |                        | AT1G51950.1                         | <i>IAA18</i>                | Indole-3-acetic acid inducible 18                                 |
| Hv.11413                                                | Hv                         | 12                   | 0.31               | 0.57               |                        | AT2G38120.1                         | <i>AUX1</i>                 | Auxin resistant 1                                                 |
| Hv.11504                                                | Hv                         | 23                   | 0.63               | 0.53               |                        | AT2G39540.1                         |                             | Gibberellin-regulated family protein                              |
| Hv.17614                                                | Hv                         | 23                   | 0.56               | 0.75               |                        | AT4G30610.1                         | <i>BRS1</i>                 | BR1 supressor 1                                                   |
| Hv.3674                                                 | Hv                         | 27                   | 0.27               | 0.66               |                        | AT1G61870.1                         | <i>PPR336</i>               | Pentatricopeptide repeat 336                                      |
| <b>Metabolism</b>                                       |                            |                      |                    |                    |                        |                                     |                             |                                                                   |
| Hv.15994                                                | Hv                         | 14                   | 0.13               | 1.12               |                        | AT1G09610.1                         | <i>GXM3</i>                 | Glucuronoxylan methyltransferase 3                                |
| Hv.10982                                                | Hv                         | 14                   | 1.00               | 0.81               |                        | AT1G08650.1                         | <i>PPCK1</i>                | Phosphoenolpyruvate carboxylase kinase 1                          |
| Hv.18832                                                | Hv                         | 14                   | 1.21               | 1.07               |                        | AT2G01770.1                         | <i>VIT1</i>                 | Vacuolar iron transporter 1                                       |
| Hv.15635                                                | Hv                         | 16                   | 0.58               | 0.98               |                        | AT3G48360.1                         | <i>BT2</i>                  | BTB and TAZ domain protein 2                                      |
| MLOC_62899.1                                            | sLC                        | 16                   | 0.55               | 2.54               |                        | AT2G18950.1                         | <i>HPT1</i>                 | Homogentisate phytyltransferase 1                                 |
| Hv.354                                                  | Hv                         | 16                   | 0.45               | 1.70               |                        | AT1G21680.1                         |                             | DPP6 N-terminal domain-like protein                               |
| Hv.15809                                                | Hv                         | 16                   | 0.22               | 0.86               |                        | AT1G22440.1                         |                             | Zinc-binding alcohol dehydrogenase family protein                 |
| contig_287828                                           | DNC-T                      | 16                   | 2.45               | 3.67               |                        | AT3G26380.1                         |                             | Melibiase family protein                                          |
| Hv.9784                                                 | Hv                         | 16                   | 3.06               | 2.40               |                        |                                     |                             |                                                                   |
| Hv.4237                                                 | Hv                         | 21                   | 0.49               | 1.42               |                        | AT4G34230.1                         | <i>CAD5</i>                 | Cinnamyl alcohol dehydrogenase 5                                  |
| Hv.8796                                                 | Hv                         | 21                   | 0.75               | 1.75               |                        | AT1G19600.1                         |                             | pfkB-like carbohydrate kinase family protein                      |
| MLOC_74713.2                                            | sHC                        | 21                   | 0.87               | 1.92               |                        |                                     |                             |                                                                   |
| Hv.24746                                                | Hv                         | 22                   | 0.32               | 0.70               |                        | AT1G62640.2                         | <i>KASIII</i>               | 3-ketoacyl-acyl carrier protein synthase III                      |

(table continued on next page)

Supplemental Table 14: continued

| Transcript                                         | Reference Set <sup>1</sup> | Coexpression Cluster | logFC <sup>2</sup> | logFC <sup>3</sup> | Barley Gene Identifier | Arabidopsis Gene Model <sup>4</sup> | Arabidopsis Gene Identifier | Description <sup>5</sup>                         |
|----------------------------------------------------|----------------------------|----------------------|--------------------|--------------------|------------------------|-------------------------------------|-----------------------------|--------------------------------------------------|
| <b>(table continued from previous page)</b>        |                            |                      |                    |                    |                        |                                     |                             |                                                  |
| <b>Metabolism</b>                                  |                            |                      |                    |                    |                        |                                     |                             |                                                  |
| Hv.3916                                            | Hv                         | 22                   | 0.27               | 0.71               |                        | AT1G30120.1                         |                             | Pyruvate dehydrogenase E1 beta                   |
| Hv.6110                                            | Hv                         | 22                   | 0.38               | 0.95               |                        | AT1G63000.1                         | <i>UER1</i>                 | Nucleotide-rhamnose synthase/epimerase-reductase |
| Hv.16152                                           | Hv                         | 23                   | 1.07               | 1.46               |                        | AT3G23510.1                         |                             | Cyclopropane-fatty-acyl-phospholipid synthase    |
| Hv.20490                                           | Hv                         | 23                   | 2.35               | 2.02               |                        | AT1G19715.3                         |                             | Mannose-binding lectin superfamily protein       |
| MLOC_24654.2                                       | sHC                        | 23                   | 2.84               | 1.63               |                        |                                     |                             |                                                  |
| contig_63792                                       | DNC-T                      | 23                   | 3.60               | 1.73               |                        |                                     |                             |                                                  |
| Hv.12805                                           | Hv                         | 27                   | 0.29               | 0.48               |                        | AT3G18080.1                         | <i>BGLU44</i>               | B-S glucosidase 44                               |
| <b>Disease resistance</b>                          |                            |                      |                    |                    |                        |                                     |                             |                                                  |
| Hv.11447                                           | Hv                         | 16                   | 0.57               | 1.23               |                        | AT3G50930.1                         | <i>BCS1</i>                 | Cytochrome BC1 synthesis                         |
| Hv.17743                                           | Hv                         | 16                   | 0.34               | 0.51               |                        | AT1G19250.1                         | <i>FMO1</i>                 | Flavin-dependent monooxygenase 1                 |
| contig_125109                                      | DNC-T                      | 16                   | 1.26               | 2.67               |                        | AT5G25930.1                         |                             | LRR receptor-like protein kinase family protein  |
| contig_80125                                       | DNC-T                      | 16                   | 1.66               | 2.39               |                        |                                     |                             |                                                  |
| Hv.10484                                           | Hv                         | 23                   | 1.63               | 1.95               |                        | AT3G22400.1                         | <i>LOX5</i>                 | Lipoxygenase 5                                   |
| <b>Chromatin modification, nucleosome assembly</b> |                            |                      |                    |                    |                        |                                     |                             |                                                  |
| Hv.11786                                           | Hv                         | 31                   | 0.29               | 0.91               |                        | AT5G58230.1                         | <i>MSI1</i>                 | Multicopy suppressor of IRA1                     |
| MLOC_71372.1                                       | sHC                        | 31                   | 0.29               | 0.67               |                        | AT2G31270.1                         | <i>CDT1</i>                 | Homolog of yeast CDT1 A                          |
| Hv.15834                                           | Hv                         | 31                   | 0.52               | 1.10               |                        | AT5G02560.1                         | <i>HTA12</i>                | Histone H2A 12                                   |
| MLOC_43244.1                                       | sHC                        | 31                   | 0.59               | 1.04               |                        |                                     |                             |                                                  |
| Hv.29208                                           | Hv                         | 23                   | 0.38               | 0.57               |                        | AT5G22880.1                         | <i>H2B</i>                  | Histone B2                                       |
| Hv.32211                                           | Hv                         | 31                   | 0.38               | 1.03               |                        |                                     |                             |                                                  |
| Hv.32725                                           | Hv                         | 31                   | 0.38               | 0.90               |                        |                                     |                             |                                                  |
| MLOC_75262.1                                       | sLC                        | 31                   | 0.31               | 0.72               |                        |                                     |                             |                                                  |
| MLOC_6467.1                                        | sLC                        | 23                   | 0.77               | 1.32               |                        | AT5G59870.1                         | <i>HTA6</i>                 | Histone H2A 6                                    |
| Hv.24307                                           | Hv                         | 31                   | 0.38               | 0.78               |                        |                                     |                             |                                                  |
| Hv.26391                                           | Hv                         | 31                   | 0.32               | 0.83               |                        |                                     |                             |                                                  |
| Hv.31863                                           | Hv                         | 31                   | 0.33               | 0.84               |                        |                                     |                             |                                                  |
| MLOC_37489.1                                       | sLC                        | 31                   | 0.45               | 1.28               |                        | AT5G59970.1                         |                             | Histone superfamily protein                      |
| Hv.22959                                           | Hv                         | 31                   | 0.33               | 0.93               |                        |                                     |                             |                                                  |
| Hv.26322                                           | Hv                         | 31                   | 0.28               | 0.66               |                        |                                     |                             |                                                  |
| Hv.31856                                           | Hv                         | 31                   | 0.37               | 0.87               |                        |                                     |                             |                                                  |
| Hv.32004                                           | Hv                         | 31                   | 0.42               | 1.00               |                        |                                     |                             |                                                  |
| Hv.32904                                           | Hv                         | 31                   | 0.35               | 0.72               |                        |                                     |                             |                                                  |
| MLOC_9919.1                                        | sLC                        | 31                   | 0.35               | 0.76               |                        |                                     |                             |                                                  |
| Hv.26128                                           | Hv                         | 23                   | 0.36               | 0.78               |                        |                                     |                             |                                                  |
| Hv.34411                                           | Hv                         | 27                   | 0.43               | 0.74               |                        |                                     |                             |                                                  |

\*Transcripts represent the expression profiles of 266 DETs upregulated in a *Ppd-H1* dependent manner in shoot apices

<sup>1</sup>Set of reference transcripts: Hv: NCBI Barley UniGenes; sHC: selected Barley High Confidence Genes; sLC: selected Barley Low Confidence Genes; DNC-T: selected *de novo* contigs

<sup>2</sup>Arabidopsis gene model (Best BLASTx hit)

<sup>3</sup>log<sub>2</sub>-fold change of transcript abundance in shoot apices of S42-IL107 as compared to Scarlett across the developmental stages W1.0-W3.5 under long-day conditions

<sup>4</sup>log<sub>2</sub>-fold change of transcript abundance comparing shoot apices of S42-IL107 under long and short photoperiods across the developmental stages W1.0-W3.5

<sup>5</sup>Annotation of Arabidopsis gene model (TAIR 10)

**Supplemental Table 15: Coexpression clusters enriched for transcripts upregulated in shoot apices by long photoperiods and in S42-IL107**

| Cluster ID | Cluster Size | Number of<br>DETs in<br>Cluster | Expected Number<br>of DETs | Enrichment <sup>1</sup> |
|------------|--------------|---------------------------------|----------------------------|-------------------------|
| Cluster 16 | 210          | 39                              | 7.35                       | 5.31 ***                |
| Cluster 21 | 141          | 17                              | 4.93                       | 3.45 ***                |
| Cluster 22 | 260          | 23                              | 9.10                       | 2.53 ***                |
| Cluster 31 | 716          | 43                              | 25.05                      | 1.72 ***                |
| Cluster 20 | 38           | 6                               | 1.33                       | 4.51 **                 |
| Cluster 14 | 105          | 11                              | 3.67                       | 2.99 **                 |
| Cluster 23 | 414          | 26                              | 14.48                      | 1.80 **                 |
| Cluster 27 | 218          | 15                              | 7.63                       | 1.97 *                  |
| Cluster 29 | 319          | 15                              | 11.16                      | 1.34                    |
| Cluster 30 | 55           | 2                               | 1.92                       | 1.04                    |
| Cluster 11 | 217          | 7                               | 7.59                       | 0.92                    |
| Cluster 28 | 333          | 10                              | 11.65                      | 0.86                    |
| Cluster 12 | 345          | 9                               | 12.07                      | 0.75                    |
| Cluster 2  | 40           | 1                               | 1.40                       | 0.71                    |
| Cluster 26 | 521          | 12                              | 18.23                      | 0.66                    |
| Cluster 24 | 139          | 3                               | 4.86                       | 0.62                    |
| Cluster 15 | 361          | 7                               | 12.63                      | 0.55                    |
| Cluster 3  | 296          | 5                               | 10.35                      | 0.48                    |
| Cluster 10 | 247          | 4                               | 8.64                       | 0.46                    |
| Cluster 18 | 311          | 3                               | 10.88                      | 0.28                    |
| Cluster 17 | 568          | 5                               | 19.87                      | 0.25                    |
| Cluster 13 | 134          | 1                               | 4.69                       | 0.21                    |
| Cluster 1  | 180          | 1                               | 6.30                       | 0.16                    |
| Cluster 19 | 454          | 1                               | 15.88                      | 0.06                    |
|            | <b>SUM</b>   | <b>266</b>                      |                            |                         |

<sup>1</sup>Chi-squared test: \*p<0.05, \*\*p<0.01, \*\*\*p<0.001

**Supplemental Table 16: GO-term enrichment for transcripts in coexpression cluster 16**

| GO-ID      | GO-Term <sup>1</sup>                                           | FDR     | GO-ID      | GO-Term <sup>1</sup>                         | FDR      |
|------------|----------------------------------------------------------------|---------|------------|----------------------------------------------|----------|
| GO:0045449 | regulation of transcription, DNA-dependent                     | 3E-10   | GO:0065007 | biological regulation                        | 4.25E-03 |
| GO:0006355 | regulation of transcription, DNA-dependent                     | 9.4E-07 | GO:0048507 | meristem development                         | 4.87E-03 |
| GO:0048466 | androecium development                                         | 1.1E-06 | GO:0048509 | regulation of meristem development           | 5.33E-03 |
| GO:0048443 | stamen development                                             | 1.1E-06 | GO:0048569 | post-embryonic organ development             | 6.85E-03 |
| GO:2001141 | regulation of RNA biosynthetic process                         | 1.3E-06 | GO:0019438 | aromatic compound biosynthetic process       | 1.03E-02 |
| GO:0051252 | regulation of RNA metabolic process                            | 1.3E-06 | GO:0018130 | heterocycle biosynthetic process             | 1.03E-02 |
| GO:0051171 | regulation of nitrogen compound metabolic process              | 1.1E-05 | GO:0010321 | regulation of vegetative phase change        | 1.14E-02 |
| GO:0019219 | regulation of nucleobase-containing compound metabolic process | 2.4E-05 | GO:0048827 | phyllome development                         | 1.54E-02 |
| GO:0010556 | regulation of macromolecule biosynthetic process               | 2.4E-05 | GO:0061458 | reproductive system development              | 1.94E-02 |
| GO:2000112 | regulation of cellular macromolecule biosynthetic process      | 2.4E-05 | GO:0048608 | reproductive structure development           | 1.94E-02 |
| GO:0032774 | RNA biosynthetic process                                       | 2.7E-05 | GO:0046351 | disaccharide biosynthetic process            | 2.05E-02 |
| GO:0006351 | transcription, DNA-dependent                                   | 2.7E-05 | GO:0009059 | macromolecule biosynthetic process           | 2.37E-02 |
| GO:0031326 | regulation of cellular biosynthetic process                    | 3.1E-05 | GO:0050793 | regulation of developmental process          | 2.48E-02 |
| GO:0009889 | regulation of biosynthetic process                             | 4.2E-05 | GO:0016070 | RNA metabolic process                        | 2.64E-02 |
| GO:0019222 | regulation of metabolic process                                | 4.8E-05 | GO:0000024 | maltose biosynthetic process                 | 2.66E-02 |
| GO:0010073 | meristem maintenance                                           | 9.1E-05 | GO:0048497 | maintenance of floral organ identity         | 2.66E-02 |
| GO:0010468 | regulation of gene expression                                  | 0.00012 | GO:0048496 | maintenance of organ identity                | 2.66E-02 |
| GO:0031323 | regulation of cellular metabolic process                       | 0.00016 | GO:0045595 | regulation of cell differentiation           | 2.81E-02 |
| GO:0080090 | regulation of primary metabolic process                        | 0.0003  | GO:0048653 | anther development                           | 3.41E-02 |
| GO:0034654 | nucleobase-containing compound biosynthetic process            | 0.00039 | GO:1901362 | organic cyclic compound biosynthetic process | 3.44E-02 |
| GO:0009908 | flower development                                             | 0.00064 | GO:0009312 | oligosaccharide biosynthetic process         | 3.65E-02 |
| GO:0048437 | floral organ development                                       | 0.0007  | GO:0010075 | regulation of meristem growth                | 3.96E-02 |
| GO:0060255 | regulation of macromolecule metabolic process                  | 0.00096 | GO:0044767 | single-organism developmental process        | 4.13E-02 |
| GO:0048367 | shoot system development                                       | 0.00182 | GO:0048833 | specification of floral organ number         | 4.70E-02 |
| GO:0044271 | cellular nitrogen compound biosynthetic process                | 0.00218 | GO:0005983 | starch catabolic process                     | 4.70E-02 |
| GO:0048438 | floral whorl development                                       | 0.00264 | GO:0043086 | negative regulation of catalytic activity    | 4.70E-02 |
| GO:0045596 | negative regulation of cell differentiation                    | 0.0028  | GO:0035266 | meristem growth                              | 4.70E-02 |
| GO:0050789 | regulation of biological process                               | 0.00306 |            |                                              |          |

<sup>1</sup>Only GO-terms assigned to biological processes are shown



**Supplemental Table 17: GO-term enrichment for transcripts in coexpression cluster 31**

| GO-ID      | GO-Term <sup>1</sup>                             | FDR      | GO-ID      | GO-Term <sup>1</sup>                                           | FDR      |
|------------|--------------------------------------------------|----------|------------|----------------------------------------------------------------|----------|
| GO:0006259 | DNA metabolic process                            | 1.34E-55 | GO:0071840 | cellular component organization or biogenesis                  | 2.73E-12 |
| GO:0051276 | chromosome organization                          | 2.77E-45 | GO:0046483 | heterocycle metabolic process                                  | 3.24E-12 |
| GO:0071103 | DNA conformation change                          | 1.56E-40 | GO:0006725 | cellular aromatic compound metabolic process                   | 3.76E-12 |
| GO:0006325 | chromatin organization                           | 1.56E-40 | GO:0016568 | chromatin modification                                         | 3.92E-12 |
| GO:0031497 | chromatin assembly                               | 6.31E-36 | GO:0034641 | cellular nitrogen compound metabolic process                   | 5.96E-12 |
| GO:0006323 | DNA packaging                                    | 2.94E-35 | GO:0006974 | response to DNA damage stimulus                                | 8.76E-12 |
| GO:0008283 | cell proliferation                               | 2.94E-35 | GO:0044260 | cellular macromolecule metabolic process                       | 1.44E-11 |
| GO:0071824 | protein-DNA complex subunit organization         | 5.80E-35 | GO:1901360 | organic cyclic compound metabolic process                      | 1.46E-10 |
| GO:0065004 | protein-DNA complex assembly                     | 5.80E-35 | GO:0044772 | mitotic cell cycle phase transition                            | 2.29E-10 |
| GO:0006333 | chromatin assembly or disassembly                | 3.83E-34 | GO:0044770 | cell cycle phase transition                                    | 2.29E-10 |
| GO:0006334 | nucleosome assembly                              | 8.37E-34 | GO:0000086 | G2/M transition of mitotic cell cycle                          | 2.52E-10 |
| GO:0034728 | nucleosome organization                          | 8.37E-34 | GO:0000281 | mitotic cytokinesis                                            | 4.55E-10 |
| GO:0007049 | cell cycle                                       | 3.86E-29 | GO:1902410 | mitotic cytokinetic process                                    | 4.55E-10 |
| GO:0006996 | organelle organization                           | 3.97E-27 | GO:0000911 | cytokinesis by cell plate formation                            | 4.55E-10 |
| GO:0090304 | nucleic acid metabolic process                   | 9.00E-25 | GO:0006281 | DNA repair                                                     | 5.76E-10 |
| GO:0006260 | DNA replication                                  | 1.64E-24 | GO:1901990 | regulation of mitotic cell cycle phase transition              | 8.78E-10 |
| GO:0022402 | cell cycle process                               | 4.30E-24 | GO:1901987 | regulation of cell cycle phase transition                      | 8.78E-10 |
| GO:0006261 | DNA-dependent DNA replication                    | 7.96E-20 | GO:0032506 | cytokinetic process                                            | 1.10E-09 |
| GO:0051301 | cell division                                    | 3.44E-19 | GO:0043170 | macromolecule metabolic process                                | 1.10E-09 |
| GO:0016043 | cellular component organization                  | 2.02E-18 | GO:0006807 | nitrogen compound metabolic process                            | 1.24E-09 |
| GO:0051567 | histone H3-K9 methylation                        | 1.00E-17 | GO:0000003 | reproduction                                                   | 1.49E-09 |
| GO:0006139 | nucleobase-containing compound metabolic process | 4.86E-17 | GO:0043414 | macromolecule methylation                                      | 1.54E-09 |
| GO:0022607 | cellular component assembly                      | 1.06E-16 | GO:0010389 | regulation of G2/M transition of mitotic cell cycle            | 1.96E-09 |
| GO:0044728 | DNA methylation or demethylation                 | 2.39E-16 | GO:0007018 | microtubule-based movement                                     | 6.62E-09 |
| GO:0006304 | DNA modification                                 | 2.39E-16 | GO:0007010 | cytoskeleton organization                                      | 8.64E-09 |
| GO:0006306 | DNA methylation                                  | 1.52E-15 | GO:0042127 | regulation of cell proliferation                               | 1.19E-08 |
| GO:0006305 | DNA alkylation                                   | 1.52E-15 | GO:0019219 | regulation of nucleobase-containing compound metabolic process | 1.24E-08 |
| GO:0051052 | regulation of DNA metabolic process              | 1.86E-15 | GO:0060255 | regulation of macromolecule metabolic process                  | 1.54E-08 |
| GO:0065003 | macromolecular complex assembly                  | 2.12E-15 | GO:0010564 | regulation of cell cycle process                               | 1.54E-08 |
| GO:0000910 | cytokinesis                                      | 5.41E-15 | GO:0000226 | microtubule cytoskeleton organization                          | 1.92E-08 |
| GO:0043933 | macromolecular complex subunit organization      | 6.13E-15 | GO:0051171 | regulation of nitrogen compound metabolic process              | 2.52E-08 |
| GO:0034622 | cellular macromolecular complex assembly         | 6.38E-15 | GO:0006928 | cellular component movement                                    | 3.35E-08 |
| GO:0034968 | histone lysine methylation                       | 7.43E-15 | GO:0009908 | flower development                                             | 9.03E-08 |
| GO:0044763 | single-organism cellular process                 | 8.25E-15 | GO:0051322 | anaphase                                                       | 9.94E-08 |
| GO:0044699 | single-organism process                          | 1.15E-14 | GO:0007346 | regulation of mitotic cell cycle                               | 1.45E-07 |
| GO:0007017 | microtubule-based process                        | 3.08E-14 | GO:0070192 | chromosome organization involved in meiosis                    | 1.70E-07 |
| GO:0006461 | protein complex assembly                         | 3.26E-14 | GO:0000279 | M phase                                                        | 2.54E-07 |
| GO:0070271 | protein complex biogenesis                       | 3.47E-14 | GO:0006342 | chromatin silencing                                            | 3.90E-07 |
| GO:0016570 | histone modification                             | 4.80E-14 | GO:0045814 | negative regulation of gene expression, epigenetic             | 3.90E-07 |
| GO:0006270 | DNA replication initiation                       | 4.89E-14 | GO:0048437 | floral organ development                                       | 5.46E-07 |
| GO:0016571 | histone methylation                              | 7.77E-14 | GO:0007129 | synapsis                                                       | 5.61E-07 |
| GO:0071822 | protein complex subunit organization             | 8.80E-14 | GO:0050794 | regulation of cellular process                                 | 7.22E-07 |
| GO:0000278 | mitotic cell cycle                               | 1.23E-13 | GO:0044085 | cellular component biogenesis                                  | 7.93E-07 |
| GO:0051726 | regulation of cell cycle                         | 1.55E-13 | GO:0051321 | meiotic cell cycle                                             | 1.20E-06 |
| GO:0016569 | covalent chromatin modification                  | 2.21E-13 | GO:0080090 | regulation of primary metabolic process                        | 1.32E-06 |
| GO:0006275 | regulation of DNA replication                    | 2.35E-13 | GO:0019222 | regulation of metabolic process                                | 1.32E-06 |
| GO:0006479 | protein methylation                              | 5.13E-13 | GO:0048466 | androecium development                                         | 1.81E-06 |
| GO:0008213 | protein alkylation                               | 5.13E-13 | GO:0048443 | stamen development                                             | 1.81E-06 |
| GO:0040029 | regulation of gene expression, epigenetic        | 2.47E-12 |            |                                                                |          |

**(table continued on next page)**<sup>1</sup>Only GO-terms assigned to biological processes are shown

Supplemental Table 17: continued

| GO-ID                                       | GO-Term <sup>1</sup>                                                    | FDR      | GO-ID                                 | GO-Term <sup>1</sup>                                                    | FDR     |
|---------------------------------------------|-------------------------------------------------------------------------|----------|---------------------------------------|-------------------------------------------------------------------------|---------|
| <b>(table continued from previous page)</b> |                                                                         |          | GO:0010332                            | response to gamma radiation                                             | 0.00011 |
| GO:0048443                                  | stamen development                                                      | 1.81E-06 | GO:0009059                            | macromolecule biosynthetic process                                      | 0.00012 |
| GO:0061458                                  | reproductive system development                                         | 2.39E-06 | GO:0048827                            | phyllome development                                                    | 0.00012 |
| GO:0048608                                  | reproductive structure development                                      | 2.39E-06 | GO:0034645                            | cellular macromolecule biosynthetic process                             | 0.00012 |
| GO:0048569                                  | post-embryonic organ development                                        | 2.91E-06 | GO:0010605                            | negative regulation of macromolecule metabolic process                  | 0.00013 |
| GO:0016458                                  | gene silencing                                                          | 3.28E-06 | GO:0044767                            | single-organism developmental process                                   | 0.00014 |
| GO:0050789                                  | regulation of biological process                                        | 4.5E-06  | GO:0009892                            | negative regulation of metabolic process                                | 0.00014 |
| GO:0031323                                  | regulation of cellular metabolic process                                | 5.1E-06  | GO:0009791                            | post-embryonic development                                              | 0.00018 |
| GO:0007126                                  | meiosis                                                                 | 5.7E-06  | GO:0007131                            | reciprocal meiotic recombination                                        | 0.00018 |
| GO:0048438                                  | floral whorl development                                                | 6E-06    | GO:0035825                            | reciprocal DNA recombination                                            | 0.00018 |
| GO:0022414                                  | reproductive process                                                    | 7.4E-06  | GO:0032508                            | DNA duplex unwinding                                                    | 0.00033 |
| GO:0045934                                  | negative regulation of nucleobase-containing compound metabolic process | 7.9E-06  | GO:0006355                            | regulation of transcription, DNA-dependent                              | 0.00035 |
| GO:0051172                                  | negative regulation of nitrogen compound metabolic process              | 7.9E-06  | GO:0016444                            | somatic cell DNA recombination                                          | 0.00041 |
| GO:0048367                                  | shoot system development                                                | 8.7E-06  | GO:0051252                            | regulation of RNA metabolic process                                     | 0.00042 |
| GO:0006302                                  | double-strand break repair                                              | 1E-05    | GO:0009653                            | anatomical structure morphogenesis                                      | 0.00043 |
| GO:0010556                                  | regulation of macromolecule biosynthetic process                        | 1.4E-05  | GO:0036211                            | protein modification process                                            | 0.00043 |
| GO:2000112                                  | regulation of cellular macromolecule biosynthetic process               | 1.4E-05  | GO:0006464                            | cellular protein modification process                                   | 0.00043 |
| GO:0003006                                  | developmental process involved in reproduction                          | 1.5E-05  | GO:0032392                            | DNA geometric change                                                    | 0.00044 |
| GO:0022403                                  | cell cycle phase                                                        | 1.6E-05  | GO:0044707                            | single-multicellular organism process                                   | 0.0005  |
| GO:0031327                                  | negative regulation of cellular biosynthetic process                    | 1.7E-05  | GO:2001141                            | regulation of RNA biosynthetic process                                  | 0.00053 |
| GO:0007127                                  | meiosis I                                                               | 2E-05    | GO:0007349                            | cellularization                                                         | 0.0006  |
| GO:0009890                                  | negative regulation of biosynthetic process                             | 2E-05    | GO:0048610                            | cellular process involved in reproduction                               | 0.00074 |
| GO:0048646                                  | anatomical structure formation involved in morphogenesis                | 2E-05    | GO:0042138                            | meiotic DNA double-strand break formation                               | 0.00076 |
| GO:0032259                                  | methylation                                                             | 2E-05    | GO:0044238                            | primary metabolic process                                               | 0.00083 |
| GO:0031326                                  | regulation of cellular biosynthetic process                             | 2.7E-05  | GO:0007059                            | chromosome segregation                                                  | 0.00111 |
| GO:0048731                                  | system development                                                      | 3.6E-05  | GO:0016572                            | histone phosphorylation                                                 | 0.00115 |
| GO:0010212                                  | response to ionizing radiation                                          | 3.7E-05  | GO:0006468                            | protein phosphorylation                                                 | 0.00176 |
| GO:0045892                                  | negative regulation of transcription, DNA-dependent                     | 3.7E-05  | GO:0009887                            | organ morphogenesis                                                     | 0.00186 |
| GO:0051253                                  | negative regulation of RNA metabolic process                            | 4E-05    | GO:0006346                            | methylation-dependent chromatin silencing                               | 0.00188 |
| GO:0009889                                  | regulation of biosynthetic process                                      | 4.4E-05  | GO:0009886                            | post-embryonic morphogenesis                                            | 0.002   |
| GO:0031324                                  | negative regulation of cellular metabolic process                       | 4.6E-05  | GO:0048653                            | anther development                                                      | 0.00235 |
| GO:0033554                                  | cellular response to stress                                             | 4.6E-05  | GO:0008356                            | asymmetric cell division                                                | 0.00243 |
| GO:0010468                                  | regulation of gene expression                                           | 4.6E-05  | GO:0048563                            | post-embryonic organ morphogenesis                                      | 0.00248 |
| GO:0010558                                  | negative regulation of macromolecule biosynthetic process               | 5E-05    | GO:0048444                            | floral organ morphogenesis                                              | 0.00248 |
| GO:2000113                                  | negative regulation of cellular macromolecule biosynthetic process      | 5E-05    | GO:0048513                            | organ development                                                       | 0.00254 |
| GO:0007275                                  | multicellular organismal development                                    | 5E-05    | GO:0032774                            | RNA biosynthetic process                                                | 0.00289 |
| GO:0006310                                  | DNA recombination                                                       | 5.2E-05  | GO:0006351                            | transcription, DNA-dependent                                            | 0.00289 |
| GO:0010629                                  | negative regulation of gene expression                                  | 5.7E-05  | GO:0044237                            | cellular metabolic process                                              | 0.00338 |
| GO:0032502                                  | developmental process                                                   | 6.3E-05  | GO:0000079                            | regulation of cyclin-dependent protein serine/threonine kinase activity | 0.00373 |
| GO:0000725                                  | recombinational repair                                                  | 6.3E-05  | GO:0031047                            | gene silencing by RNA                                                   | 0.00379 |
| GO:0000724                                  | double-strand break repair via homologous recombination                 | 6.3E-05  | GO:0031048                            | chromatin silencing by small RNA                                        | 0.00447 |
| GO:0009987                                  | cellular process                                                        | 6.4E-05  | GO:0043412                            | macromolecule modification                                              | 0.00451 |
| GO:0032501                                  | multicellular organismal process                                        | 8.5E-05  | GO:0048523                            | negative regulation of cellular process                                 | 0.0046  |
| GO:0048856                                  | anatomical structure development                                        | 0.0001   | GO:0048509                            | regulation of meristem development                                      | 0.00482 |
| GO:0065007                                  | biological regulation                                                   | 0.00011  | <b>(table continued on next page)</b> |                                                                         |         |

<sup>1</sup>Only GO-terms assigned to biological processes are shown

## Supplemental Table 17: continued

| GO-ID                                       | GO-Term <sup>1</sup>                                   | FDR      | GO-ID      | GO-Term <sup>1</sup>                                             | FDR      |
|---------------------------------------------|--------------------------------------------------------|----------|------------|------------------------------------------------------------------|----------|
| <b>(table continued from previous page)</b> |                                                        |          | GO:0071900 | regulation of protein serine/threonine kinase activity           | 2.04E-02 |
| GO:0048449                                  | floral organ formation                                 | 0.00628  | GO:0010075 | regulation of meristem growth                                    | 2.19E-02 |
| GO:0051225                                  | spindle assembly                                       | 0.00667  | GO:0048507 | meristem development                                             | 2.37E-02 |
| GO:0048645                                  | organ formation                                        | 0.00688  | GO:0051026 | chiasma assembly                                                 | 2.71E-02 |
| GO:2000026                                  | regulation of multicellular organismal development     | 0.00713  | GO:0034654 | nucleobase-containing compound biosynthetic process              | 2.74E-02 |
| GO:0000280                                  | nuclear division                                       | 0.00721  | GO:0009558 | embryo sac cellularization                                       | 2.74E-02 |
| GO:0033044                                  | regulation of chromosome organization                  | 0.00736  | GO:0035266 | meristem growth                                                  | 3.06E-02 |
| GO:0006471                                  | protein ADP-ribosylation                               | 0.00988  | GO:0050793 | regulation of developmental process                              | 3.16E-02 |
| GO:0071704                                  | organic substance metabolic process                    | 0.01107  | GO:0071514 | genetic imprinting                                               | 3.28E-02 |
| GO:0051239                                  | regulation of multicellular organismal process         | 0.01166  | GO:0006349 | regulation of gene expression by genetic imprinting              | 3.28E-02 |
| GO:0007051                                  | spindle organization                                   | 0.01255  | GO:0048519 | negative regulation of biological process                        | 3.50E-02 |
| GO:0007062                                  | sister chromatid cohesion                              | 0.0155   | GO:0043247 | telomere maintenance in response to DNA damage                   | 3.57E-02 |
| GO:0010639                                  | negative regulation of organelle organization          | 0.01728  | GO:0048638 | regulation of developmental growth                               | 3.60E-02 |
| GO:0051129                                  | negative regulation of cellular component organization | 0.01728  | GO:0031032 | actomyosin structure organization                                | 3.81E-02 |
| GO:0070925                                  | organelle assembly                                     | 0.01784  | GO:0032776 | DNA methylation on cytosine                                      | 3.81E-02 |
| GO:0048285                                  | organelle fission                                      | 0.01834  | GO:1902407 | assembly of actomyosin apparatus involved in mitotic cytokinesis | 3.81E-02 |
| GO:0090305                                  | nucleic acid phosphodiester bond hydrolysis            | 0.01834  | GO:0000914 | phragmoplast assembly                                            | 3.81E-02 |
| GO:0006268                                  | DNA unwinding involved in DNA replication              | 1.84E-02 | GO:0000912 | assembly of actomyosin apparatus involved in cytokinesis         | 3.81E-02 |
| GO:0007112                                  | male meiosis cytokinesis                               | 2.03E-02 | GO:0010073 | meristem maintenance                                             | 4.34E-02 |
| GO:0033206                                  | meiotic cytokinesis                                    | 2.03E-02 | GO:0007140 | male meiosis                                                     | 4.70E-02 |
| GO:0010245                                  | radial microtubular system formation                   | 2.03E-02 | GO:0040008 | regulation of growth                                             | 4.81E-02 |

<sup>1</sup>Only GO-terms assigned to biological processes are shown

Supplemental Table 18: Overview of RNA samples and sequencing statistics

| Tissue                 | Photoperiod | Genotype  | Wad. Stage | Timepoint <sup>1</sup> | Library | Raw Data Read Number | Filtered Data Read Number | Total Mapped Reads | Uniquely Mapped Reads | Mapped Reads (<10 Positions) | Unmapped Reads | % Total Mapped Reads <sup>1</sup> | % Uniquely Mapped Reads <sup>1</sup> | % Mapped Reads <sup>2</sup> (<10 Positions) | % Unmapped Reads <sup>1</sup> |
|------------------------|-------------|-----------|------------|------------------------|---------|----------------------|---------------------------|--------------------|-----------------------|------------------------------|----------------|-----------------------------------|--------------------------------------|---------------------------------------------|-------------------------------|
| Apex                   | Short day   | S42-IL107 | 0.5        | 0                      | A       | 16459061             | 9893302                   | 8074964            | 7604962               | 470002                       | 1818338        | 81.62                             | 76.87                                | 4.75                                        | 18.38                         |
| Apex                   | Short day   | S42-IL107 | 0.5        | 0                      | B       | 7474058              | 4219953                   | 3486797            | 3276316               | 210481                       | 733156         | 82.63                             | 77.64                                | 4.99                                        | 17.37                         |
| Apex                   | Short day   | S42-IL107 | 0.5        | 0                      | C       | 10626845             | 2642659                   | 2082591            | 1953507               | 129084                       | 560068         | 78.81                             | 73.92                                | 4.88                                        | 21.19                         |
| Apex                   | Long day    | Scarlett  | 1.0        | 3                      | D       | 17104663             | 9738819                   | 5369553            | 5046743               | 322810                       | 4369266        | 55.14                             | 51.82                                | 3.31                                        | 44.86                         |
| Apex                   | Long day    | Scarlett  | 1.0        | 3                      | E       | 14897387             | 9397113                   | 7723833            | 7278930               | 444903                       | 1673280        | 82.19                             | 77.46                                | 4.73                                        | 17.81                         |
| Apex                   | Long day    | Scarlett  | 1.0        | 3                      | F       | 17730966             | 11537432                  | 9579412            | 9033763               | 545649                       | 1958020        | 83.03                             | 78.30                                | 4.73                                        | 16.97                         |
| Apex                   | Long day    | S42-IL107 | 1.0        | 3                      | G       | 19358313             | 10951141                  | 8969982            | 8445259               | 524723                       | 1981159        | 81.91                             | 77.12                                | 4.79                                        | 18.09                         |
| Apex                   | Long day    | S42-IL107 | 1.0        | 3                      | H       | 17092440             | 10071274                  | 8000971            | 7537109               | 463862                       | 2070303        | 79.44                             | 74.84                                | 4.61                                        | 20.56                         |
| Apex                   | Long day    | S42-IL107 | 1.0        | 3                      | I       | 16566298             | 9109101                   | 7535252            | 7099987               | 435265                       | 1573849        | 82.72                             | 77.94                                | 4.78                                        | 17.28                         |
| Apex                   | Long day    | S42-IL107 | 2.0        | 6                      | J       | 32563534             | 18201818                  | 1.1E+07            | 14085315              | 846588                       | 3269915        | 82.04                             | 77.38                                | 4.65                                        | 17.96                         |
| Apex                   | Long day    | S42-IL107 | 2.0        | 6                      | K       | 23951610             | 14142385                  | 1.1E+07            | 10187863              | 602323                       | 3352199        | 76.30                             | 72.04                                | 4.26                                        | 23.70                         |
| Apex                   | Long day    | S42-IL107 | 2.0        | 6                      | (L)     | -                    | -                         | -                  | -                     | -                            | -              | -                                 | -                                    | -                                           | -                             |
| Leaf                   | Long day    | S42-IL107 | 2.0        | 6                      | M       | 17760086             | 9100127                   | 7598589            | 6795801               | 802788                       | 1501538        | 83.50                             | 74.68                                | 8.82                                        | 16.50                         |
| Leaf                   | Long day    | S42-IL107 | 2.0        | 6                      | N       | 21814456             | 11176202                  | 9382236            | 8423041               | 959195                       | 1793966        | 83.95                             | 75.37                                | 8.58                                        | 16.05                         |
| Leaf                   | Long day    | S42-IL107 | 2.0        | 6                      | O       | 20289165             | 11362454                  | 9504470            | 8624381               | 880089                       | 1857984        | 83.65                             | 75.90                                | 7.75                                        | 16.35                         |
| Apex                   | Long day    | Scarlett  | 2.0        | 9                      | P       | 14359218             | 9911948                   | 8200558            | 7735749               | 464809                       | 1711390        | 82.73                             | 78.04                                | 4.69                                        | 17.27                         |
| Apex                   | Long day    | Scarlett  | 2.0        | 9                      | Q       | 20007830             | 12535122                  | 1E+07              | 9666980               | 573298                       | 2294844        | 81.69                             | 77.12                                | 4.57                                        | 18.31                         |
| Apex                   | Long day    | Scarlett  | 2.0        | 9                      | R       | 21999556             | 14020216                  | 1.1E+07            | 10837222              | 649945                       | 2533049        | 81.93                             | 77.30                                | 4.64                                        | 18.07                         |
| Apex                   | Short day   | S42-IL107 | 2.0        | 16                     | S       | 18856390             | 12755506                  | 1.1E+07            | 9919814               | 612186                       | 2223506        | 82.57                             | 77.77                                | 4.80                                        | 17.43                         |
| Apex                   | Short day   | S42-IL107 | 2.0        | 16                     | T       | 17899889             | 12181159                  | 1E+07              | 9428186               | 576210                       | 2176763        | 82.13                             | 77.40                                | 4.73                                        | 17.87                         |
| Apex                   | Short day   | S42-IL107 | 2.0        | 16                     | U       | 13652340             | 9440970                   | 7869896            | 7406957               | 462939                       | 1571074        | 83.36                             | 78.46                                | 4.90                                        | 16.64                         |
| Apex                   | Short day   | S42-IL107 | 1.0        | 7                      | V       | 21151250             | 13207739                  | 1.1E+07            | 10435541              | 647039                       | 2125159        | 83.91                             | 79.01                                | 4.90                                        | 16.09                         |
| Apex                   | Short day   | S42-IL107 | 1.0        | 7                      | W       | 14840256             | 9907029                   | 8187503            | 7711492               | 476011                       | 1719526        | 82.64                             | 77.84                                | 4.80                                        | 17.36                         |
| Apex                   | Short day   | S42-IL107 | 1.0        | 7                      | X       | 17692798             | 11220700                  | 9302660            | 8762766               | 539894                       | 1918040        | 82.91                             | 78.09                                | 4.81                                        | 17.09                         |
| Leaf                   | Long day    | Scarlett  | 1.0        | 3                      | A1      | 9026797              | 5432759                   | 3185557            | 2828665               | 356892                       | 2247202        | 58.64                             | 52.07                                | 6.57                                        | 41.36                         |
| Leaf                   | Long day    | Scarlett  | 1.0        | 3                      | B1      | 9895345              | 4829142                   | 3239058            | 2876667               | 362391                       | 1590084        | 67.07                             | 59.57                                | 7.50                                        | 32.93                         |
| Leaf                   | Long day    | Scarlett  | 1.0        | 3                      | C1      | 8040428              | 4686020                   | 2850797            | 2535253               | 315544                       | 1835223        | 60.84                             | 54.10                                | 6.73                                        | 39.16                         |
| Leaf                   | Long day    | S42-IL107 | 1.0        | 3                      | D1      | 9475973              | 5380083                   | 3907323            | 3523777               | 383546                       | 1472760        | 72.63                             | 65.50                                | 7.13                                        | 27.37                         |
| Leaf                   | Long day    | S42-IL107 | 1.0        | 3                      | E1      | 8876566              | 4646223                   | 3713020            | 3314891               | 398129                       | 933203         | 79.91                             | 71.35                                | 8.57                                        | 20.09                         |
| Leaf                   | Long day    | S42-IL107 | 1.0        | 3                      | F1      | 24420300             | 10662510                  | 8223394            | 7468010               | 755384                       | 2439116        | 77.12                             | 70.04                                | 7.08                                        | 22.88                         |
| Leaf                   | Long day    | Scarlett  | 2.0        | 9                      | G1      | 9299840              | 5336032                   | 4592336            | 4157580               | 434756                       | 743696         | 86.06                             | 77.92                                | 8.15                                        | 13.94                         |
| Leaf                   | Long day    | Scarlett  | 2.0        | 9                      | H1      | 7859909              | 4607638                   | 3677568            | 3319688               | 357880                       | 930070         | 79.81                             | 72.05                                | 7.77                                        | 20.19                         |
| Leaf                   | Long day    | Scarlett  | 2.0        | 9                      | I1      | 12377623             | 7455485                   | 6276388            | 5731061               | 545327                       | 1179097        | 84.18                             | 76.87                                | 7.31                                        | 15.82                         |
| Apex                   | Long day    | S42-IL107 | 3.5        | 14                     | J1      | 9050764              | 6141815                   | 5143688            | 4799701               | 343987                       | 998127         | 83.75                             | 78.15                                | 5.60                                        | 16.25                         |
| Apex                   | Long day    | S42-IL107 | 3.5        | 14                     | K1      | 9570762              | 6339239                   | 5331268            | 4963348               | 367920                       | 1007971        | 84.10                             | 78.30                                | 5.80                                        | 15.90                         |
| Apex                   | Long day    | S42-IL107 | 3.5        | 14                     | L1      | 5162724              | 3936287                   | 3336398            | 3112804               | 223594                       | 599889         | 84.76                             | 79.08                                | 5.68                                        | 15.24                         |
| Leaf                   | Short day   | S42-IL107 | 2.0        | 16                     | M1      | 10116020             | 5391320                   | 4624600            | 4151410               | 473190                       | 766720         | 85.78                             | 77.00                                | 8.78                                        | 14.22                         |
| Leaf                   | Short day   | S42-IL107 | 2.0        | 16                     | N1      | 12074847             | 6675503                   | 5723413            | 5184815               | 538598                       | 952090         | 85.74                             | 77.67                                | 8.07                                        | 14.26                         |
| Leaf                   | Short day   | S42-IL107 | 2.0        | 16                     | O1      | 9963482              | 6130135                   | 5248033            | 4789203               | 458830                       | 882102         | 85.61                             | 78.13                                | 7.48                                        | 14.39                         |
| Apex                   | Long day    | Scarlett  | 3.5        | 20                     | P1      | 9581977              | 6883431                   | 5746021            | 5378877               | 367144                       | 1137410        | 83.48                             | 78.14                                | 5.33                                        | 16.52                         |
| Apex                   | Long day    | Scarlett  | 3.5        | 20                     | X1      | 6427149              | 4848100                   | 3928855            | 3680523               | 248332                       | 919245         | 81.04                             | 75.92                                | 5.12                                        | 18.96                         |
| Apex                   | Long day    | Scarlett  | 3.5        | 20                     | Y1      | 12725456             | 8450127                   | 6829176            | 6404370               | 424806                       | 1620951        | 80.82                             | 75.79                                | 5.03                                        | 19.18                         |
| Leaf                   | Short day   | S42-IL107 | 1.0        | 7                      | Z1      | 11063884             | 6040842                   | 4537274            | 4100767               | 436507                       | 1503568        | 75.11                             | 67.88                                | 7.23                                        | 24.89                         |
| Leaf                   | Short day   | S42-IL107 | 1.0        | 7                      | AA1     | 8988461              | 4958127                   | 4163623            | 3762488               | 401135                       | 794504         | 83.98                             | 75.89                                | 8.09                                        | 16.02                         |
| Leaf                   | Short day   | S42-IL107 | 1.0        | 7                      | AB1     | 11010676             | 5172688                   | 4344558            | 3893009               | 451549                       | 828130         | 83.99                             | 75.26                                | 8.73                                        | 16.01                         |
| Apex                   | Short day   | S42-IL107 | 3.5        | 50                     | AC1     | 23918237             | 7202925                   | 5797197            | 5368935               | 428262                       | 1405728        | 80.48                             | 74.54                                | 5.95                                        | 19.52                         |
| Apex                   | Short day   | S42-IL107 | 3.5        | 50                     | AD1     | 9282564              | 6444967                   | 5295853            | 4945492               | 350361                       | 1149114        | 82.17                             | 76.73                                | 5.44                                        | 17.83                         |
| Apex                   | Short day   | S42-IL107 | 3.5        | 50                     | AE1     | 10104901             | 6672267                   | 5455680            | 5110588               | 345092                       | 1216587        | 81.77                             | 76.59                                | 5.17                                        | 18.23                         |
| <b>Average 1st Set</b> |             |           |            |                        |         | 18006453             | 10727138                  | 8692947            | 8143378               | 549569                       | 2034191        | 80.90                             | 75.75                                | 5.15                                        | 19.10                         |
| <b>Average 2nd Set</b> |             |           |            |                        |         | 10763134             | 6013486                   | 4798795            | 4391747               | 407048                       | 1214691        | 79.53                             | 72.69                                | 6.85                                        | 20.47                         |
| <b>Average</b>         |             |           |            |                        |         | 14307737             | 8320167                   | 6704444            | 6227651               | 476793                       | 1615723        | 80.20                             | 74.19                                | 6.02                                        | 19.80                         |

<sup>1</sup>Days after separation of plants into short-day or long-day conditions<sup>2</sup>Proportion relative to the number of filtered reads

**Supplemental Table 19: Correlation analysis for quality control of biological replicates used for RNA sequencing**

| Tissue | Photoperiod | Genotype  | Waddington Stage | Rep1 vs. Rep2 * | Rep1 vs. Rep3 * | Rep2 vs. Rep3 * |
|--------|-------------|-----------|------------------|-----------------|-----------------|-----------------|
| Apex   | Short day   | S42-IL107 | 0.5              | 0.99            | 0.96            | 0.98            |
| Apex   | Short day   | S42-IL107 | 1                | 0.99            | 0.99            | 0.98            |
| Apex   | Long day    | Scarlett  | 1                | 0.95            | 0.94            | 0.99            |
| Apex   | Long day    | S42-IL107 | 1                | 0.99            | 0.99            | 0.99            |
| Apex   | Short day   | S42-IL107 | 2                | 1.00            | 0.99            | 0.99            |
| Apex   | Long day    | Scarlett  | 2                | 0.98            | 0.99            | 0.98            |
| Apex   | Long day    | S42-IL107 | 2                | 0.98            | -               | -               |
| Apex   | Short day   | S42-IL107 | 3.5              | 0.86            | 0.85            | 0.98            |
| Apex   | Long day    | Scarlett  | 3.5              | 0.99            | 0.99            | 0.99            |
| Apex   | Long day    | S42-IL107 | 3.5              | 0.99            | 0.99            | 0.99            |
| Leaf   | Short day   | S42-IL107 | 1                | 0.99            | 0.97            | 0.97            |
| Leaf   | Long day    | Scarlett  | 1                | 0.99            | 0.92            | 0.92            |
| Leaf   | Long day    | S42-IL107 | 1                | 0.97            | 0.96            | 0.97            |
| Leaf   | Short day   | S42-IL107 | 2                | 0.98            | 0.92            | 0.97            |
| Leaf   | Long day    | Scarlett  | 2                | 0.95            | 0.98            | 0.94            |
| Leaf   | Long day    | S42-IL107 | 2                | 0.99            | 0.97            | 0.98            |

\*r, Pearson's correlation coefficient for RPKM expression levels of 25152 transcripts between biological replicates,  $p < 10^{-8}$

**Supplemental Table 20: Statistics of coexpression clustering**

| <b>Cluster ID</b> | <b>Average Probability<sup>1</sup></b> | <b>StDev Probability<sup>1</sup></b> | <b>Cluster Size<sup>2</sup></b> |
|-------------------|----------------------------------------|--------------------------------------|---------------------------------|
| <b>1</b>          | 0.967                                  | 0.095                                | 180                             |
| <b>2</b>          | 0.998                                  | 0.008                                | 40                              |
| <b>3</b>          | 0.975                                  | 0.083                                | 296                             |
| <b>4</b>          | 0.970                                  | 0.108                                | 79                              |
| <b>5</b>          | 0.998                                  | 0.007                                | 10                              |
| <b>6</b>          | 0.982                                  | 0.074                                | 157                             |
| <b>7</b>          | 0.979                                  | 0.069                                | 214                             |
| <b>8</b>          | 0.950                                  | 0.115                                | 125                             |
| <b>9</b>          | 0.969                                  | 0.095                                | 95                              |
| <b>10</b>         | 0.964                                  | 0.100                                | 247                             |
| <b>11</b>         | 0.966                                  | 0.095                                | 217                             |
| <b>12</b>         | 0.966                                  | 0.096                                | 345                             |
| <b>13</b>         | 0.977                                  | 0.083                                | 134                             |
| <b>14</b>         | 0.978                                  | 0.063                                | 105                             |
| <b>15</b>         | 0.952                                  | 0.112                                | 361                             |
| <b>16</b>         | 0.976                                  | 0.087                                | 210                             |
| <b>17</b>         | 0.949                                  | 0.117                                | 568                             |
| <b>18</b>         | 0.936                                  | 0.131                                | 311                             |
| <b>19</b>         | 0.942                                  | 0.123                                | 454                             |
| <b>20</b>         | 0.953                                  | 0.119                                | 38                              |
| <b>21</b>         | 0.965                                  | 0.105                                | 141                             |
| <b>22</b>         | 0.965                                  | 0.101                                | 260                             |
| <b>23</b>         | 0.962                                  | 0.096                                | 414                             |
| <b>24</b>         | 0.954                                  | 0.117                                | 139                             |
| <b>25</b>         | 0.951                                  | 0.113                                | 302                             |
| <b>26</b>         | 0.932                                  | 0.133                                | 521                             |
| <b>27</b>         | 0.955                                  | 0.122                                | 218                             |
| <b>28</b>         | 0.936                                  | 0.127                                | 333                             |
| <b>29</b>         | 0.942                                  | 0.129                                | 319                             |
| <b>30</b>         | 0.982                                  | 0.068                                | 55                              |
| <b>31</b>         | 0.960                                  | 0.108                                | 716                             |
| <b>1-31</b>       | 0.963                                  | 0.031                                | 245 ± 167                       |

<sup>1</sup>Average probability and standard deviation for all DETs grouping into the respective coexpression cluster

<sup>2</sup>Number of DETs in coexpression cluster

**Supplemental Table 21: Oligonucleotide sequences used in RT-qPCR assays**

| Gene          | Transcript ID <sup>1</sup> | 5' -> 3'<br>fwd - Primer<br>Sequence | 5' -> 3'<br>rev - Primer<br>Sequence | Reference                           |
|---------------|----------------------------|--------------------------------------|--------------------------------------|-------------------------------------|
| <i>Actin</i>  | Hv.23088                   | CGTGTGGATTCTGGTGATG                  | AGCCACATATGCGAGCTTCT                 | Campoli et al. 2012b                |
| <i>BM3</i>    | Hv.4298                    | GCCGTCAACAGCACAAGCAA                 | CCCCATTCAACCCTGTAGCAAAGA             | this study                          |
| <i>Vrn-H1</i> | Hv.23025                   | CTGAAAGCGAAGGTTGAGAC                 | TTCTCCTCCTGCAGTGACCT                 | Campoli et al. 2012b                |
| <i>BM8</i>    | Hv.169                     | CCACAGCAGCCGACACCTA                  | TGCCTTTGGGGGAGAAGACG                 | this study                          |
| <i>CO1</i>    | MLOC_6921.1                | CTGCTGGGGCTAGTGCTTAC                 | CCTTGTTGCATAACGTGTGG                 | Campoli et al. 2012a                |
| <i>CO2</i>    | MLOC_75496.6               | AGTGGA CTCTTGGCTCCTCA                | CATGCTGCTGTTCTTGCA TT                | Campoli et al. 2012b                |
| <i>FT1</i>    | Hv.34809                   | GGTAGACCCAGATGCTCCAA                 | TCGTAGCACA TCACCTCCTG                | fw d primer in Campoli et al. 2012a |
| <i>FT2</i>    | Hv.17258                   | TACCGAGGTTGTGTGCTACG                 | TCACATCCTTCTCCGCCGG                  | this study                          |
| <i>SOC1-1</i> | Hv.32986                   | TTTGACGCAAGTCAAAGCTG                 | CCTCTGATGATGCGGAGACT                 | this study                          |

<sup>1</sup>Transcript Sequences available at the National Center for Biotechnology Information (NCBI: <http://www.ncbi.nlm.nih.gov>) and at the PGSB barley genome database (<http://pgsb.helmholtz-muenchen.de/plant/barley>), respectively.

## Supplemental methods

### Design of the reference sequence

To obtain a comprehensive reference sequence, we compared the mapping efficiency of the filtered reads against two sets of transcript clusters available for barley.

Recently, the International Barley Genome Sequencing Consortium (IBGSC) published the draft genome sequence of barley including the transcribed gene space assigned to a set of 26,159 annotated high-confidence genes (HC) and a set of 53,220 low-confidence genes (LC) (IBGSC, Nature 2012). Sequences of the HC and LC were downloaded from the Barley project webpage ([ftp://ftpmips.helmholtz-muenchen.de/plants/barley/public\\_data/genes/](ftp://ftpmips.helmholtz-muenchen.de/plants/barley/public_data/genes/), sequence version of March 23<sup>rd</sup>, 2012). Secondly, a cluster of 26,944 barley UniGenes (UniGene build #59 at NCBI), henceforth referred to as unigenes, was downloaded from NCBI ([ftp://ftp.ncbi.nih.gov/repository/UniGene/Hordeum\\_vulgare/](ftp://ftp.ncbi.nih.gov/repository/UniGene/Hordeum_vulgare/)) and used for comparison.

Filtered reads of all libraries were combined and mapped against the respective reference sequences using the RNA-Seq Analysis function of CLC with default parameters. Test mappings were performed on the unigenes, HC and LC sets alone and on various combinations of those. In addition, we assembled *de novo* contigs using CLC *de novo* assemble tool.

To determine the appropriate core reference set for our study, we estimated the extent of sequence redundancy within the different reference sets using BLASTn. Redundancy was defined as a proportion of blast hits longer than 100bp with 97% identity. Furthermore, as an estimate for sequence redundancy, we extracted the proportion of reads with multiple mapping positions ( $\leq 10$  positions) within a respective reference set. In addition to low sequence redundancy, we expected a comprehensive set of reference sequences to yield a high proportion of reads with unique mapping positions and a low percentage of reads assigned as unmapped, i.e. reads without mapping position or mapped to more than ten locations.

The unigenes were selected as a core set due to its lowest sequence redundancy and highest proportion of uniquely mapping reads as compared to the HC and LC datasets (Supplemental Fig. 9B), e.g. in total we mapped 280,871,398 reads against the unigene set, of which 269,468,960 reads had unique and 11,402,438 reads had multiple mapping positions. Against transcripts of the HC dataset, we mapped 226,964,864 reads in total with unique and multiple mapping positions for 206,228,484 reads and 20,736,380 reads, respectively. Thus, other datasets were added to transcripts of the unigene set in the following order of priority: HC, LC, *de novo* contigs.



Redundancy in the combined datasets was eliminated using Minimus2 software with parameters set to 130bp overlap and 97% minimum identity. Filtering transcripts appropriately yielded 8,391 HC (sHC) and 23,232 LC (sLC) progressively added to the unigenes.

To allow the identification of new transcripts specific for shoot apex tissue used in our study, we used CLC *de novo* assembly tool with default parameters to construct a set of 473,651 *de novo* contigs (DNC) from 85,0125,80 reads, which did not map to a reference sequence constructed from unigenes, sHC and sLC. Contigs were filtered for a minimum length of 200bp and a 10X average coverage. A set of 10,172 DNC with BLASTx hits in the *Triticeae* family (E-value  $\leq 10^{-5}$ ), henceforth DNC-T, was selected from the 75,675 DNC identified as Minimus2 singletons. A schematic representation of the pipeline used to construct the reference sequence is presented in Supplemental Fig. 13A.

In summary, a final set of 68,739 transcripts, consisting of 26,944 unigenes, 8,391 sHC, 23,232 sLC and 10,172 DNC-T, was used as a custom reference for the RNA-sequencing analysis. Using this as reference set, 80.6% (315,108,855 reads) of the quality filtered reads could be mapped in total with 74.9% (292,699,606 reads) having unique and 5.7% (22,409,249 reads) multiple mapping positions.

The reference set was annotated using BLASTx against protein databases of *Arabidopsis* (TAIR version 10), *Brachypodium* (*Brachypodium distachyon*, Project version 1.2), Rice (MSU Rice Genome Annotation Project release 7) and *Sorghum* (1.4, Paterson et al., 2009) with cut-off E-value  $10^{-5}$ .

The open reading frames (ORF) of barley transcripts were predicted using the OrfPredictor software guided by the BLASTx results against TAIR ( $\geq 30$  aa, Min et al., 2005). Conserved domain annotation of the translated ORFs was performed using InterProScan4 software (Hunter et al., 2011). These data together with the top 20 BLASTx hits against the *Viridiplantae* sub-set of NCBI 'nr' database were used to determine gene ontology (GO) terms for the reference barley transcripts using Blast2GO pipe 2.5.0 (Conesa et al., 2005). An overview the reference sequence annotation pipeline is depicted in Supplemental Fig. 13B.

## Supplemental References

- Conesa, A., Götz, S., García-Gómez, J.M., Terol, J., Talón, M., and Robles, M. (2005). Blast2GO: a universal tool for annotation, visualization and analysis in functional genomics research. *Bioinformatics* 21, 3674-3676.
- IBGSC. (2012). International Barley Genome Sequencing Consortium. A physical, genetic and functional sequence assembly of the barley genome. *Nature* 491, 711-716.
- Hunter, S., Jones, P., Mitchell, A., Apweiler, R., Attwood, T.K., Bateman, A., Bernard, T., Binns, D., Bork, P., Burge, S., De Castro, E., Coggill, P., Corbett, M., Das, U., Daugherty, L., Duquenne, L., Finn, R.D., Fraser, M., Gough, J., Haft, D., Hulo, N., Kahn, D., Kelly, E., Letunic, I., Lonsdale, D., Lopez, R., Madera, M., Maslen, J., McAnulla, C., McDowall, J., McMenamin, C., Mi, H., Mutowo-Muellenet, P., Mulder, N., Natale, D., Orengo, C., Pesseat, S., Punta, M., Quinn, A.F., Rivoire, C., Sangrador-Vegas, A., Selengut, J.D., Sigrist, C.J.A., Scheremetjew, M., Tate, J., Thimmajananathan, M., Thomas, P.D., Wu, C.H., Yeats, C., Yong, S.Y. (2012). InterPro in 2011: New developments in the family and domain prediction database. *Nucleic Acids Res.* 40.
- Mascher, M., Richmond, T.A., Gerhardt, D.J., Himmelbach, A., Clissold, L., Sampath, D., Ayling, S., Steuernagel, B., Pfeifer, M., D'Ascenzo, M., Akhunov, E.D., Hedley, P.E., Gonzales, A.M., Morrell, P.L., Kilian, B., Blattner, F.R., Scholz, U., Mayer, K.F.X., Flavell, A.J., Muehlbauer, G.J., Waugh, R., Jeddloh, J.A., and Stein, N. (2013). Barley whole exome capture: a tool for genomic research in the genus *Hordeum* and beyond. *The Plant Journal* 76, 494-505.
- Min, X.J., Butler, G., Storms, R., and Tsang, A. (2005). OrfPredictor: Predicting protein-coding regions in EST-derived sequences. *Nucleic Acids Res.* 33.
- Paterson, A.H., Bowers, J.E., Bruggmann, R., Dubchak, I., Grimwood, J., Gundlach, H., Haberler, G., Hellsten, U., Mitros, T., Poliakov, A., Schmutz, J., Spannagl, M., Tang, H., Wang, X., Wicker, T., Bharti, A.K., Chapman, J., Feltus, F.A., Gowik, U., Grigoriev, I.V., Lyons, E., Maher, C.A., Martis, M., Narechania, A., Otiillar, R.P., Penning, B.W., Salamov, A.A., Wang, Y., Zhang, L., Carpita, N.C., Freeling, M., Gingle, A.R., Hash, C.T., Keller, B.,

Klein, P., Kresovich, S., McCann, M.C., Ming, R., Peterson, D.G., Mehboob-ur-Rahman., Ware, D., Westhoff, P., Mayer, K.F.X., Messing, J., Rokhsar, D.S (2009). The Sorghum bicolor genome and the diversification of grasses. *Nature* 457: 551–556.
